# Supplementary material for: miR-101-3p suppresses proliferation of orbital fibroblasts by targeting pentraxin-3 in thyroid eye disease
Source: PeerJ journal article supplement (doi:10.7717/peerj.18535), 2024-11-15
Supplement: MIQE_checklist.xls [file MIQE_checklist.xls]

## Sheet: Sheet1
ITEM TO CHECK	IMPORTANCE	CHECKLIST
EXPERIMENTAL DESIGN
Definition of experimental and control groups	E	page 4, line 129-134;page 7, line 260-262
Number within each group	E	page 7, line 255-256;page 7, line 261
Assay carried out by core lab or investigator's lab?	D	NA
Acknowledgement of authors' contributions	D	NA
SAMPLE
Description	E	NA
Volume/mass of sample processed	D	NA
Microdissection or macrodissection	E	NA
Processing procedure	E	NA
If frozen - how and how quickly?	E	NA
If fixed - with what, how quickly?	E	NA
Sample storage conditions and duration (especially for FFPE samples)	E	NA
NUCLEIC ACID EXTRACTION
Procedure and/or instrumentation	E	NA
Name of kit and details of any modifications	E	page 5, line 178-179
Source of additional reagents used	D	NA
Details of DNase or RNAse treatment	E	NA
Contamination assessment (DNA or RNA)	E	NA
Nucleic acid quantification	E	page 5, line 179-180
Instrument and method	E	page 5, line 178-180
Purity (A260/A280)	D	page 5, line 179-180
Yield	D	page 5, line 179-180
RNA integrity method/instrument	E	NA
RIN/RQI or Cq of 3' and 5' transcripts	E	NA
Electrophoresis traces	D	NA
Inhibition testing (Cq dilutions, spike or other)	E	NA
REVERSE TRANSCRIPTION
Complete reaction conditions	E	page 5, line 182-185
Amount of RNA and reaction volume	E	page 5, line 182-185
Priming oligonucleotide (if using GSP) and concentration	E	page 5, line 182-185
Reverse transcriptase and concentration	E	page 5, line 182-185
Temperature and time	E	page 5, line 182-185
Manufacturer of reagents and catalogue numbers	D	page 5, line 182-185
Cqs with and without RT	D*	NA
Storage conditions of cDNA	D	NA
qPCR TARGET INFORMATION
If multiplex, efficiency and LOD of each assay.	E	NA
Sequence accession number	E	NA
Location of amplicon	D	NA
Amplicon length	E	NA
In silico specificity screen (BLAST, etc)	E	NA
Pseudogenes, retropseudogenes or other homologs?	D	NA
Sequence alignment	D	NA
Secondary structure analysis of amplicon	D	NA
Location of each primer by exon or intron (if applicable)	E	NA
What splice variants are targeted?	E	NA
qPCR OLIGONUCLEOTIDES
Primer sequences	E	page 5, line 188
RTPrimerDB Identification Number	D	NA
Probe sequences	D**	NA
Location and identity of any modifications	E	NA
Manufacturer of oligonucleotides	D	NA
Purification method	D	NA
qPCR PROTOCOL
Complete reaction conditions	E	page 5, line 182-185
Reaction volume and amount of cDNA/DNA	E	page 5, line 182-185
Primer, (probe), Mg++ and dNTP concentrations	E	page 5, line 182-185
Polymerase identity and concentration	E	page 5, line 182-185
Buffer/kit identity and manufacturer	E	page 5, line 182-185
Exact chemical constitution of the buffer	D	NA
Additives (SYBR Green I, DMSO, etc.)	E	page 5, line 182-185
Manufacturer of plates/tubes and catalog number	D	NA
Complete thermocycling parameters	E	NA
Reaction setup (manual/robotic)	D	NA
Manufacturer of qPCR instrument	E	page 5, line 182-185
qPCR VALIDATION
Evidence of optimisation (from gradients)	D	NA
Specificity (gel, sequence, melt, or digest)	E	NA
For SYBR Green I, Cq of the NTC	E	NA
Standard curves with slope and y-intercept	E	NA
PCR efficiency calculated from slope	E	NA
Confidence interval for PCR efficiency or standard error	D	NA
r2 of standard curve	E	NA
Linear dynamic range	E	NA
Cq variation at lower limit	E	NA
Confidence intervals throughout range	D	NA
Evidence for limit of detection	E	NA
If multiplex, efficiency and LOD of each assay.	E	NA
DATA ANALYSIS
qPCR analysis program (source, version)	E	NA
Cq method determination	E	page 5, line 187-188
Outlier identification and disposition	E	NA
Results of NTCs	E	NA
Justification of number and choice of reference genes	E	page 5, line 182, line 186
Description of normalisation method	E	page 5, line 188
Number and concordance of biological replicates	D	NA
Number and stage (RT or qPCR) of technical replicates	E	page 5, line 187
Repeatability (intra-assay variation)	E	NA
Reproducibility (inter-assay variation, %CV)	D	NA
Power analysis	D	NA
Statistical methods for result significance	E	page 6, line 238
Software (source, version)	E	page 6, line 236
Cq or raw data submission using RDML	D	NA
Table 1. MIQE checklist for authors, reviewers and editors. All essential information (E) must be submitted with the manuscript. Desirable
information (D) should be submitted if available. If using primers obtained from RTPrimerDB, information on qPCR target, oligonucleotides,
protocols and validation is available from that source.
*: Assessing the absence of DNA using a no RT assay is essential when first extracting RNA. Once the sample has been validated as
RDNA-free, inclusion of a no-RT control is desirable, but no longer essential.
**: Disclosure of the probe sequence is highly desirable and strongly encouraged. However, since not all commercial pre-designed assay
vendors provide this information, it cannot be an essential requirement. Use of such assays is advised against.
