# Supplementary material for: miR-101-3p suppresses proliferation of orbital fibroblasts by targeting pentraxin-3 in thyroid eye disease
Source: PeerJ journal article supplement (doi:10.7717/peerj.18535), 2024-11-15
Supplement: Raw_data_1.zip [file 48h.xlsx]

## Sheet: Sheet1
48h		cell1			cell2			cell3
	blank	mimic NC	mimic	blank	mimic NC	mimic	blank	mimic NC	mimic
	0.5379	0.5669	0.4691	0.6122	0.6319	0.5282	0.5622	0.56	0.471
	0.541	0.552	0.4654	0.6192	0.633	0.5309	0.554	0.5566	0.4738
	0.5343	0.5528	0.4658	0.6119	0.6273	0.5173	0.5537	0.5627	0.4666
	0.539	0.5496	0.4688	0.6123	0.626	0.5346	0.5568	0.563	0.4783
	0.533	0.5475	0.468	0.6088	0.6335	0.525	0.5489	0.5511	0.4691
	0.5446	0.5675	0.4591	0.6176	0.6242	0.5203	0.5546	0.5573	0.4774
