# Supplementary material for: miR-101-3p suppresses proliferation of orbital fibroblasts by targeting pentraxin-3 in thyroid eye disease
Source: PeerJ journal article supplement (doi:10.7717/peerj.18535), 2024-11-15
Supplement: Raw_data_1.zip [file 48h.xlsx]

## Sheet: Sheet1
48h		cell1				cell2				cell3
	blank	mimic NC	mimic	mimic+rhPTX3	blank	mimic NC	mimic	mimic+rhPTX3	blank	mimic NC	mimic	mimic+rhPTX3
	0.733	0.7496	0.6371	0.6854	0.6816	0.6824	0.5585	0.6409	0.6648	0.6679	0.5686	0.6138
	0.7243	0.7428	0.6208	0.6858	0.6711	0.6834	0.559	0.6273	0.6644	0.6752	0.5597	0.6066
	0.7248	0.7412	0.6415	0.6878	0.6717	0.6795	0.5626	0.6446	0.6682	0.6756	0.574	0.6183
	0.7206	0.7502	0.6296	0.678	0.6667	0.677	0.5616	0.635	0.6587	0.6613	0.5629	0.6091
	0.7311	0.739	0.6244	0.6791	0.6793	0.691	0.5509	0.6303	0.6655	0.6688	0.5729	0.6174
