# Supplementary material for: miR-101-3p suppresses proliferation of orbital fibroblasts by targeting pentraxin-3 in thyroid eye disease
Source: PeerJ journal article supplement (doi:10.7717/peerj.18535), 2024-11-15
Supplement: Raw_data_1.zip [file 72h.xlsx]

## Sheet: Sheet1
72h		cell1				cell2				cell3
	blank	mimic NC	mimic	mimic+rhPTX3	blank	mimic NC	mimic	mimic+rhPTX3	blank	mimic NC	mimic	mimic+rhPTX3
	1.006	0.9158	0.7645	0.8741	0.8803	0.9009	0.6807	0.8287	0.8501	0.8852	0.6089	0.7486
	1.019	0.9638	0.7336	0.8793	0.8867	0.9124	0.6985	0.8009	0.8947	0.8334	0.6427	0.7791
	0.9377	0.9301	0.7259	0.8412	0.9274	0.8808	0.657	0.794	0.8916	0.881	0.6512	0.7867
	0.9796	0.987	0.7446	0.8594	0.9448	0.8921	0.6753	0.8108	0.845	0.8513	0.6147	0.7538
	0.952	0.9486	0.7244	0.8564	0.8795	0.9132	0.6749	0.7926	0.8621	0.8709	0.6699	0.8032
