# Supplementary material for: miR-101-3p suppresses proliferation of orbital fibroblasts by targeting pentraxin-3 in thyroid eye disease
Source: PeerJ journal article supplement (doi:10.7717/peerj.18535), 2024-11-15
Supplement: Raw_data_1.zip [file Data analysis.xlsx]

## Sheet: Sheet1
Well Position	Well	Sample Name	Target Name	CT	CT1	CT2	CT3	CT mean		blank1	NC1	mimic1	blank2	NC2	mimic2	blank3	NC3	mimic3
A1	1	blank1	GAPDH	15.6164	15.6164	15.6234	15.7355	15.6584	GAPDH	15.6584	15.4485	15.7776	15.3583	15.2436	15.5458	16.0964	16.207	16.2415
A2	2	NC1	GAPDH	15.5087	15.5087	15.3423	15.4945	15.4485	PTX3	21.9698	21.8027	22.8937	21.3386	21.2564	22.2974	22.125	22.4597	23.1567
A3	3	mimic1	GAPDH	15.7441	15.7441	15.7647	15.824	15.7776
A4	4	blank2	GAPDH	15.3173	15.3173	15.2308	15.5267	15.3583	ΔCT	6.31138	6.35417	7.11608	5.98029	6.01284	6.75167	6.02863	6.25264	6.91518
A5	5	NC2	GAPDH	15.3337	15.3337	15.1814	15.2158	15.2436
A6	6	mimic2	GAPDH	15.5534	15.5534	15.5067	15.5771	15.5458	NC ΔCT mean	6.20655
A7	7	blank3	GAPDH	16.143	16.143	15.9629	16.1833	16.0964
A8	8	NC3	GAPDH	16.2292	16.2292	16.1338	16.2582	16.207	ΔΔCT	0.104835	0.147619	0.909532	-0.226255	-0.193713	0.545121	-0.177922	0.046094	0.708628
A9	9	mimic3	GAPDH	16.1902	16.1902	16.2113	16.323	16.2415
B1	10	blank1	GAPDH	15.6234					2^(-ΔΔCT)	0.929911	0.902739	0.532358	1.16979	1.1437	0.685334	1.13125	0.968555	0.611902
B2	11	NC1	GAPDH	15.3423
B3	12	mimic1	GAPDH	15.7647
B4	13	blank2	GAPDH	15.2308
B5	14	NC2	GAPDH	15.1814									2^(-ΔΔCT)
B6	15	mimic2	GAPDH	15.5067								blank	0.929911
B7	16	blank3	GAPDH	15.9629									1.16979
B8	17	NC3	GAPDH	16.1338									1.13125
B9	18	mimic3	GAPDH	16.2113								NC	0.902739
C1	19	blank1	GAPDH	15.7355									1.1437
C2	20	NC1	GAPDH	15.4945									0.968555
C3	21	mimic1	GAPDH	15.824								mimic	0.532358
C4	22	blank2	GAPDH	15.5267									0.685334
C5	23	NC2	GAPDH	15.2158									0.611902
C6	24	mimic2	GAPDH	15.5771
C7	25	blank3	GAPDH	16.1833
C8	26	NC3	GAPDH	16.2582
C9	27	mimic3	GAPDH	16.323
D1	28	blank1	PTX3	21.6667	21.6667	22.2834	21.9594	21.9698
D2	29	NC1	PTX3	21.8618	21.8618	21.916	21.6302	21.8027
D3	30	mimic1	PTX3	23.1143	23.1143	22.8551	22.7116	22.8937
D4	31	blank2	PTX3	21.3291	21.3291	21.4818	21.2048	21.3386
D5	32	NC2	PTX3	21.2573	21.2573	21.3723	21.1397	21.2564
D6	33	mimic2	PTX3	22.3679	22.3679	22.1012	22.4232	22.2974
D7	34	blank3	PTX3	22.1901	22.1901	21.9712	22.2138	22.125
D8	35	NC3	PTX3	22.4839	22.4839	22.3705	22.5247	22.4597
D9	36	mimic3	PTX3	23.1353	23.1353	23.0463	23.2884	23.1567
E1	37	blank1	PTX3	22.2834
E2	38	NC1	PTX3	21.916
E3	39	mimic1	PTX3	22.8551
E4	40	blank2	PTX3	21.4818
E5	41	NC2	PTX3	21.3723
E6	42	mimic2	PTX3	22.1012
E7	43	blank3	PTX3	21.9712
E8	44	NC3	PTX3	22.3705
E9	45	mimic3	PTX3	23.0463
F1	46	blank1	PTX3	21.9594
F2	47	NC1	PTX3	21.6302
F3	48	mimic1	PTX3	22.7116
F4	49	blank2	PTX3	21.2048
F5	50	NC2	PTX3	21.1397
F6	51	mimic2	PTX3	22.4232
F7	52	blank3	PTX3	22.2138
F8	53	NC3	PTX3	22.5247
F9	54	mimic3	PTX3	23.2884
