# Supplementary material for: miR-101-3p suppresses proliferation of orbital fibroblasts by targeting pentraxin-3 in thyroid eye disease
Source: PeerJ journal article supplement (doi:10.7717/peerj.18535), 2024-11-15
Supplement: Raw_data_1.zip [file Data analysis.xlsx]

## Sheet: Sheet1
Well Position	Well	Sample Name	Target Name	CT	CT1	CT2	CT3	CT mean		blank①	NC①	mimic①	mimic+rhPTX3①	blank②	NC②	mimic②	mimic+rhPTX3②	blank③	NC③	mimic③	mimic+rhPTX3③
A1	1	blank①	U6	20.375	20.375	20.6183	20.6959	20.563	U6	20.563	21.8518	21.0486	21.2727	21.1762	21.0458	21.573	21.4924	20.006	21.1277	20.5513	20.7033
A2	2	NC①	U6	21.6067	21.6067	21.8713	22.0774	21.8518	miR-101-3p	29.7929	30.8765	23.6467	23.826	29.9655	29.6593	23.9123	23.9055	29.1075	30.3037	22.9223	23.211
A3	3	mimic①	U6	21.1055	21.1055	21.0454	20.995	21.0486
A4	4	mimic+rhPTX3①	U6	21.2621	21.2621	21.0989	21.4571	21.2727	ΔCT	9.22989	9.02471	2.5981	2.55327	8.78931	8.61348	2.33925	2.41313	9.10149	9.17591	2.37103	2.50773
A5	5	blank②	U6	21.1332	21.1332	21.1423	21.253	21.1762
A6	6	NC②	U6	21.0354	21.0354	20.8754	21.2266	21.0458	NC ΔCT mean	8.93803
A7	7	mimic②	U6	21.5811	21.5811	21.5321	21.606	21.573
A8	8	mimic+rhPTX3②	U6	21.3947	21.3947	21.5359	21.5465	21.4924	ΔΔCT	0.291857	0.0866756	-6.33993	-6.38476	-0.148722	-0.324552	-6.59878	-6.52491	0.16346	0.237877	-6.567	-6.4303
A9	9	blank③	U6	20.0573	20.0573	19.8592	20.1016	20.006
A10	10	NC③	U6	21.1521	21.1521	21.0471	21.184	21.1277	2^(-ΔΔCT)	0.81685	0.94169	81.0044	83.5609	1.10859	1.25228	96.9236	92.0857	0.892881	0.847992	94.8123	86.2411
A11	11	mimic③	U6	20.4592	20.4592	20.6024	20.5923	20.5513
A12	12	mimic+rhPTX3③	U6	20.5762	20.5762	20.7268	20.8068	20.7033
B1	13	blank①	U6	20.6183
B2	14	NC①	U6	21.8713										2^(-ΔΔCT)
B3	15	mimic①	U6	21.0454									blank	0.81685
B4	16	mimic+rhPTX3①	U6	21.0989										1.10859
B5	17	blank②	U6	21.1423										0.892881
B6	18	NC②	U6	20.8754									NC	0.94169
B7	19	mimic②	U6	21.5321										1.25228
B8	20	mimic+rhPTX3②	U6	21.5359										0.847992
B9	21	blank③	U6	19.8592									mimic	81.0044
B10	22	NC③	U6	21.0471										96.9236
B11	23	mimic③	U6	20.6024										94.8123
B12	24	mimic+rhPTX3③	U6	20.7268									mimic+rhPTX3	83.5609
C1	25	blank①	U6	20.6959										92.0857
C2	26	NC①	U6	22.0774										86.2411
C3	27	mimic①	U6	20.995
C4	28	mimic+rhPTX3①	U6	21.4571
C5	29	blank②	U6	21.253
C6	30	NC②	U6	21.2266
C7	31	mimic②	U6	21.606
C8	32	mimic+rhPTX3②	U6	21.5465
C9	33	blank③	U6	20.1016
C10	34	NC③	U6	21.184
C11	35	mimic③	U6	20.5923
C12	36	mimic+rhPTX3③	U6	20.8068
D1	37	blank①	miR-101-3p	29.7745	29.7745	29.4758	30.1285	29.7929
D2	38	NC①	miR-101-3p	30.9776	30.9776	30.8629	30.789	30.8765
D3	39	mimic①	miR-101-3p	23.7042	23.7042	23.6091	23.6269	23.6467
D4	40	mimic+rhPTX3①	miR-101-3p	23.8818	23.8818	23.7895	23.8067	23.826
D5	41	blank②	miR-101-3p	29.9555	29.9555	30.1159	29.825	29.9655
D6	42	NC②	miR-101-3p	29.6601	29.6601	29.7809	29.5367	29.6593
D7	43	mimic②	miR-101-3p	23.9863	23.9863	23.8062	23.9444	23.9123
D8	44	mimic+rhPTX3②	miR-101-3p	23.8285	23.8285	23.9275	23.9605	23.9055
D9	45	blank③	miR-101-3p	29.1791	29.1791	29.0383	29.1052	29.1075
D10	46	NC③	miR-101-3p	30.3303	30.3303	30.2055	30.3752	30.3037
D11	47	mimic③	miR-101-3p	22.9088	22.9088	22.8909	22.9672	22.9223
D12	48	mimic+rhPTX3③	miR-101-3p	23.273	23.273	23.2075	23.1525	23.211
E1	49	blank①	miR-101-3p	29.4758
E2	50	NC①	miR-101-3p	30.8629
E3	51	mimic①	miR-101-3p	23.6091
E4	52	mimic+rhPTX3①	miR-101-3p	23.7895
E5	53	blank②	miR-101-3p	30.1159
E6	54	NC②	miR-101-3p	29.7809
E7	55	mimic②	miR-101-3p	23.8062
E8	56	mimic+rhPTX3②	miR-101-3p	23.9275
E9	57	blank③	miR-101-3p	29.0383
E10	58	NC③	miR-101-3p	30.2055
E11	59	mimic③	miR-101-3p	22.8909
E12	60	mimic+rhPTX3③	miR-101-3p	23.2075
F1	61	blank①	miR-101-3p	30.1285
F2	62	NC①	miR-101-3p	30.789
F3	63	mimic①	miR-101-3p	23.6269
F4	64	mimic+rhPTX3①	miR-101-3p	23.8067
F5	65	blank②	miR-101-3p	29.825
F6	66	NC②	miR-101-3p	29.5367
F7	67	mimic②	miR-101-3p	23.9444
F8	68	mimic+rhPTX3②	miR-101-3p	23.9605
F9	69	blank③	miR-101-3p	29.1052
F10	70	NC③	miR-101-3p	30.3752
F11	71	mimic③	miR-101-3p	22.9672
F12	72	mimic+rhPTX3③	miR-101-3p	23.1525
