# Supplementary material for: miR-101-3p suppresses proliferation of orbital fibroblasts by targeting pentraxin-3 in thyroid eye disease
Source: PeerJ journal article supplement (doi:10.7717/peerj.18535), 2024-11-15
Supplement: Raw_data_1.zip [file data analysis.xlsx]

## Sheet: Sheet1
	cell1	TAO	mimic NC	mimic	mimic+rhPTX3			TAO	mimic NC	mimic	mimic+rhPTX3			TAO	mimic NC	mimic	mimic+rhPTX3			TAO	mimic NC	mimic	mimic+rhPTX3
	0H	0.2534	0.2451	0.2456	0.2466		24H	0.413	0.4227	0.3741	0.4146		48H	0.733	0.7496	0.6371	0.6854		72H	1.006	0.9158	0.7645	0.8741
		0.2575	0.2515	0.2448	0.2526			0.4238	0.4287	0.3688	0.4043			0.7243	0.7428	0.6208	0.6858			1.019	0.9638	0.7336	0.8793
		0.2547	0.2525	0.2549	0.2486			0.4198	0.4246	0.3785	0.3981			0.7248	0.7412	0.6415	0.6878			0.9377	0.9301	0.7259	0.8412
		0.2457	0.2542	0.2437	0.2427			0.4166	0.4262	0.3754	0.3953			0.7206	0.7502	0.6296	0.678			0.9796	0.987	0.7446	0.8594
		0.249	0.2536	0.247	0.2501			0.4171	0.4362	0.3663	0.4138			0.7311	0.739	0.6244	0.6791			0.952	0.9486	0.7244	0.8564
	cell2	TAO	mimic NC	mimic	mimic+rhPTX3			TAO	mimic NC	mimic	mimic+rhPTX3			TAO	mimic NC	mimic	mimic+rhPTX3			TAO	mimic NC	mimic	mimic+rhPTX3
	0H	0.2316	0.2328	0.2334	0.2391		24H	0.4016	0.415	0.348	0.3801		48H	0.6816	0.6824	0.5585	0.6409		72H	0.8803	0.9009	0.6807	0.8287
		0.2433	0.2339	0.2326	0.2382			0.4122	0.4126	0.3435	0.3739			0.6711	0.6834	0.559	0.6273			0.8867	0.9124	0.6985	0.8009
		0.2406	0.2348	0.2395	0.2469			0.4088	0.4197	0.3517	0.3853			0.6717	0.6795	0.5626	0.6446			0.9274	0.8808	0.657	0.794
		0.2414	0.2434	0.2416	0.2374			0.4022	0.4093	0.3491	0.3816			0.6667	0.677	0.5616	0.635			0.9448	0.8921	0.6753	0.8108
		0.2358	0.2376	0.2347	0.2396			0.4046	0.4156	0.3413	0.3709			0.6793	0.691	0.5509	0.6303			0.8795	0.9132	0.6749	0.7926
	cell3	TAO	mimic NC	mimic	mimic+rhPTX3			TAO	mimic NC	mimic	mimic+rhPTX3			TAO	mimic NC	mimic	mimic+rhPTX3			TAO	mimic NC	mimic	mimic+rhPTX3
	0H	0.2361	0.2329	0.232	0.2394		24H	0.387	0.3945	0.3446	0.3754		48H	0.6648	0.6679	0.5686	0.6138		72H	0.8501	0.8852	0.6089	0.7486
		0.2283	0.2304	0.2252	0.2321			0.3893	0.404	0.3329	0.3617			0.6644	0.6752	0.5597	0.6066			0.8947	0.8334	0.6427	0.7791
		0.2353	0.2279	0.228	0.2352			0.3825	0.3964	0.3392	0.3691			0.6682	0.6756	0.574	0.6183			0.8916	0.881	0.6512	0.7867
		0.2305	0.2237	0.2228	0.2296			0.3918	0.3951	0.3368	0.3662			0.6587	0.6613	0.5629	0.6091			0.845	0.8513	0.6147	0.7538
		0.2394	0.2303	0.2303	0.2387			0.3856	0.4023	0.3439	0.3746			0.6655	0.6688	0.5729	0.6174			0.8621	0.8709	0.6699	0.8032
		TAO						MEAN	SD
cell1	0H	0.2534	0.2575	0.2547	0.2457	0.249		0.25206	0.004695
cell2		0.2316	0.2433	0.2406	0.2414	0.2358		0.23854	0.00476319
cell3		0.2361	0.2283	0.2353	0.2305	0.2394		0.23392	0.00447124
cell1	24H	0.413	0.4238	0.4198	0.4166	0.4171		0.41806	0.0040197
cell2		0.4016	0.4122	0.4088	0.4022	0.4046		0.40588	0.00452681
cell3		0.387	0.3893	0.3825	0.3918	0.3856		0.38724	0.00354443
cell1	48H	0.733	0.7243	0.7248	0.7206	0.7311		0.72676	0.00513838
cell2		0.6816	0.6711	0.6717	0.6667	0.6793		0.67408	0.00618078
cell3		0.6648	0.6644	0.6682	0.6587	0.6655		0.66432	0.00347376
cell1	72H	1.006	1.019	0.9377	0.9796	0.952		0.97886	0.0345107
cell2		0.8803	0.8867	0.9274	0.9448	0.8795		0.90374	0.030303
cell3		0.8501	0.8947	0.8916	0.845	0.8621		0.8687	0.0231928
		TAO-mimics NC						MEAN	SD
cell1	0H	0.2451	0.2515	0.2525	0.2542	0.2536		0.25138	0.00366019
cell2		0.2328	0.2339	0.2348	0.2434	0.2376		0.2365	0.00424735
cell3		0.2329	0.2304	0.2279	0.2237	0.2303		0.22904	0.00346958
cell1	24H	0.4227	0.4287	0.4246	0.4262	0.4362		0.42768	0.00524662
cell2		0.415	0.4126	0.4197	0.4093	0.4156		0.41444	0.00384487
cell3		0.3945	0.404	0.3964	0.3951	0.4023		0.39846	0.00437756
cell1	48H	0.7496	0.7428	0.7412	0.7502	0.739		0.74456	0.00506241
cell2		0.6824	0.6834	0.6795	0.677	0.691		0.68266	0.00529604
cell3		0.6679	0.6752	0.6756	0.6613	0.6688		0.66976	0.00590872
cell1	72H	0.9158	0.9638	0.9301	0.987	0.9486		0.94906	0.0279403
cell2		0.9009	0.9124	0.8808	0.8921	0.9132		0.89988	0.0137821
cell3		0.8852	0.8334	0.881	0.8513	0.8709		0.86436	0.0216971
		TAO-hsa-miR-101-3p mimic						MEAN	SD
cell1	0H	0.2456	0.2448	0.2549	0.2437	0.247		0.2472	0.00446934
cell2		0.2334	0.2326	0.2395	0.2416	0.2347		0.23636	0.00396774
cell3		0.232	0.2252	0.228	0.2228	0.2303		0.22766	0.003728
cell1	24H	0.3741	0.3688	0.3785	0.3754	0.3663		0.37262	0.00497564
cell2		0.348	0.3435	0.3517	0.3491	0.3413		0.34672	0.00423816
cell3		0.3446	0.3329	0.3392	0.3368	0.3439		0.33948	0.00490683
cell1	48H	0.6371	0.6208	0.6415	0.6296	0.6244		0.63068	0.0086097
cell2		0.5585	0.559	0.5626	0.5616	0.5509		0.55852	0.00459424
cell3		0.5686	0.5597	0.574	0.5629	0.5729		0.56762	0.00621587
cell1	72H	0.7645	0.7336	0.7259	0.7446	0.7244		0.7386	0.0165434
cell2		0.6807	0.6985	0.657	0.6753	0.6749		0.67728	0.0148564
cell3		0.6089	0.6427	0.6512	0.6147	0.6699		0.63748	0.0255063
		TAO-hsa-miR-101-3p mimic+rhPTX3						MEAN	SD
cell1	0H	0.2466	0.2526	0.2486	0.2427	0.2501		0.24812	0.00373858
cell2		0.2391	0.2382	0.2469	0.2374	0.2396		0.24024	0.00381746
cell3		0.2394	0.2321	0.2352	0.2296	0.2387		0.235	0.00420298
cell1	24H	0.4146	0.4043	0.3981	0.3953	0.4138		0.40522	0.00882536
cell2		0.3801	0.3739	0.3853	0.3816	0.3709		0.37836	0.0058573
cell3		0.3754	0.3617	0.3691	0.3662	0.3746		0.3694	0.00575891
cell1	48H	0.6854	0.6858	0.6878	0.678	0.6791		0.68322	0.0043763
cell2		0.6409	0.6273	0.6446	0.635	0.6303		0.63562	0.0071838
cell3		0.6138	0.6066	0.6183	0.6091	0.6174		0.61304	0.00510519
cell1	72H	0.8741	0.8793	0.8412	0.8594	0.8564		0.86208	0.0151363
cell2		0.8287	0.8009	0.794	0.8108	0.7926		0.8054	0.0148837
cell3		0.7486	0.7791	0.7867	0.7538	0.8032		0.77428	0.0228733
		cell1	cell2	cell3	cell1	cell2	cell3	cell1	cell2	cell3	cell1	cell2	cell3
			TAO			mimic NC			mimic			mimic+rhPTX3
	0H	0.2521	0.2385	0.2339	0.2514	0.2365	0.229	0.2472	0.2364	0.2277	0.24812	0.24024	0.235
	24H	0.4181	0.4059	0.3872	0.4277	0.4144	0.3985	0.3726	0.3467	0.3395	0.40522	0.37836	0.3694
	48H	0.7268	0.6741	0.6643	0.7446	0.6827	0.6698	0.6307	0.5585	0.5676	0.68322	0.63562	0.61304
	72H	0.9789	0.9037	0.8687	0.9491	0.8999	0.8644	0.7386	0.6773	0.6375	0.86208	0.8054	0.77428
