# Supplementary material for: miR-101-3p suppresses proliferation of orbital fibroblasts by targeting pentraxin-3 in thyroid eye disease
Source: PeerJ journal article supplement (doi:10.7717/peerj.18535), 2024-11-15
Supplement: Raw_data_1.zip [file Data analysis.xlsx]

## Sheet: Sheet1
Well Position	Well	Sample Name	Target Name	CT1	CT2	CT3	CT mean		NC1	NC2	NC3	NC4	NC5	NC6	TAO1	TAO2	TAO3	TAO4	TAO5	TAO6
A1	1	NC1	U6	12.4201	12.3505	12.3868	12.3858	U6	12.3858	13.0217	12.3358	13.5612	12.8295	12.1708	11.9052	11.6316	12.2605	11.509	10.747	10.9562
A2	2	NC2	U6	13.1077	13.0015	12.9558	13.0217	miR-101-3p	11.117	11.0276	10.7115	11.4444	11.2806	10.5083	11.1623	10.9456	11.0283	10.1209	9.75985	10.3422
A3	3	NC3	U6	12.3617	12.2953	12.3505	12.3358
A4	4	NC4	U6	13.6276	13.5921	13.4639	13.5612	ΔCT	-1.26884	-1.99413	-1.62436	-2.11681	-1.54886	-1.66247	-0.742887	-0.685991	-1.2322	-1.3881	-0.987197	-0.614019
A5	5	NC5	U6	12.9068	12.8125	12.7691	12.8295
A6	6	NC6	U6	12.171	12.2602	12.0812	12.1708	NC ΔCT mean	-1.70258
A7	7	TAO1	U6	11.881	11.9365	11.8979	11.9052
A8	8	TAO2	U6	11.7343	11.6141	11.5464	11.6316	ΔΔCT	0.433735	-0.291549	0.0782211	-0.414233	0.15372	0.0401067	0.959692	1.01659	0.470376	0.31448	0.715383	1.08856
A9	9	TAO3	U6	12.2607	12.3013	12.2194	12.2605
A10	10	TAO4	U6	11.5653	11.4593	11.5023	11.509	2^(-ΔΔCT)	0.740343	1.22395	0.947225	1.33259	0.89893	0.972583	0.514167	0.494284	0.721777	0.804141	0.609044	0.47023
A11	11	TAO5	U6	10.677	10.7602	10.8039	10.747
A12	12	TAO6	U6	11.0238	11.0944	10.7504	10.9562
B1	13	NC1	U6
B2	14	NC2	U6
B3	15	NC3	U6
B4	16	NC4	U6
B5	17	NC5	U6
B6	18	NC6	U6
B7	19	TAO1	U6
B8	20	TAO2	U6
B9	21	TAO3	U6
B10	22	TAO4	U6
B11	23	TAO5	U6
B12	24	TAO6	U6
C1	25	NC1	U6
C2	26	NC2	U6
C3	27	NC3	U6
C4	28	NC4	U6
C5	29	NC5	U6
C6	30	NC6	U6
C7	31	TAO1	U6
C8	32	TAO2	U6
C9	33	TAO3	U6
C10	34	TAO4	U6
C11	35	TAO5	U6
C12	36	TAO6	U6
D1	37	NC1	miR-101-3p	11.276	11.1513	10.9236	11.117
D2	38	NC2	miR-101-3p	11.0724	10.967	11.0433	11.0276
D3	39	NC3	miR-101-3p	10.7739	10.6515	10.7089	10.7115
D4	40	NC4	miR-101-3p	11.5612	11.439	11.333	11.4444
D5	41	NC5	miR-101-3p	11.3772	11.241	11.2236	11.2806
D6	42	NC6	miR-101-3p	10.5839	10.4877	10.4534	10.5083
D7	43	TAO1	miR-101-3p	11.0847	11.234	11.168	11.1623
D8	44	TAO2	miR-101-3p	10.9371	10.9572	10.9425	10.9456
D9	45	TAO3	miR-101-3p	10.9663	11.0049	11.1136	11.0283
D10	46	TAO4	miR-101-3p	10.1866	10.1188	10.0572	10.1209
D11	47	TAO5	miR-101-3p	9.7837	9.6733	9.82255	9.75985
D12	48	TAO6	miR-101-3p	10.2733	10.3922	10.361	10.3422
E1	49	NC1	miR-101-3p
E2	50	NC2	miR-101-3p
E3	51	NC3	miR-101-3p
E4	52	NC4	miR-101-3p
E5	53	NC5	miR-101-3p
E6	54	NC6	miR-101-3p
E7	55	TAO1	miR-101-3p
E8	56	TAO2	miR-101-3p
E9	57	TAO3	miR-101-3p
E10	58	TAO4	miR-101-3p
E11	59	TAO5	miR-101-3p
E12	60	TAO6	miR-101-3p
F1	61	NC1	miR-101-3p
F2	62	NC2	miR-101-3p
F3	63	NC3	miR-101-3p
F4	64	NC4	miR-101-3p
F5	65	NC5	miR-101-3p
F6	66	NC6	miR-101-3p
F7	67	TAO1	miR-101-3p
F8	68	TAO2	miR-101-3p
F9	69	TAO3	miR-101-3p
F10	70	TAO4	miR-101-3p
F11	71	TAO5	miR-101-3p
F12	72	TAO6	miR-101-3p
