# Supplementary material for: miR-101-3p suppresses proliferation of orbital fibroblasts by targeting pentraxin-3 in thyroid eye disease
Source: PeerJ journal article supplement (doi:10.7717/peerj.18535), 2024-11-15
Supplement: Raw_data_1.zip [file data analysis.xlsx]

## Sheet: Sheet1
	cell1	TAO	TAO-mimics NC	TAO-hsa-miR-101-3p mimic				TAO	TAO-mimics NC	TAO-hsa-miR-101-3p mimic				TAO	TAO-mimics NC	TAO-hsa-miR-101-3p mimic			TAO	TAO-mimics NC	TAO-hsa-miR-101-3p mimic
	0H	0.2573	0.2535	0.2587			24H	0.4757	0.4739	0.4163			48H	0.5379	0.5669	0.4691		72H	0.7845	0.8606	0.6254
		0.2495	0.2559	0.2526				0.4842	0.4718	0.4146				0.541	0.552	0.4654			0.7931	0.8305	0.6042
		0.2617	0.2633	0.2586				0.48	0.4654	0.4043				0.5343	0.5528	0.4658			0.7988	0.84	0.6203
		0.2588	0.2601	0.258				0.4728	0.4761	0.3981				0.539	0.5496	0.4688			0.8355	0.8232	0.5829
		0.2596	0.2578	0.2487				0.4773	0.4686	0.3953				0.533	0.5475	0.468			0.8508	0.8217	0.5994
		0.2536	0.258	0.256				0.4747	0.4807	0.4138				0.5446	0.5675	0.4591			0.7923	0.8407	0.599
	cell2	TAO	TAO-mimics NC	TAO-hsa-miR-101-3p mimic				TAO	TAO-mimics NC	TAO-hsa-miR-101-3p mimic				TAO	TAO-mimics NC	TAO-hsa-miR-101-3p mimic			TAO	TAO-mimics NC	TAO-hsa-miR-101-3p mimic
	0H	0.2685	0.2642	0.271			24H	0.4873	0.4891	0.4372			48H	0.6122	0.6319	0.5282		72H	0.8853	0.8999	0.6552
		0.2725	0.2668	0.2641				0.4895	0.4808	0.4401				0.6192	0.633	0.5309			0.9063	0.8611	0.6887
		0.2769	0.2704	0.2632				0.4986	0.4879	0.4339				0.6119	0.6273	0.5173			0.918	0.9043	0.6609
		0.2739	0.2715	0.2719				0.4939	0.483	0.4453				0.6123	0.626	0.5346			0.8448	0.874	0.654
		0.2643	0.2733	0.262				0.4902	0.4849	0.4416				0.6088	0.6335	0.525			0.8825	0.9252	0.6708
		0.2678	0.2727	0.2656				0.4908	0.4972	0.4309				0.6176	0.6242	0.5203			0.8577	0.8906	0.6526
	cell3	TAO	TAO-mimics NC	TAO-hsa-miR-101-3p mimic				TAO	TAO-mimics NC	TAO-hsa-miR-101-3p mimic				TAO	TAO-mimics NC	TAO-hsa-miR-101-3p mimic			TAO	TAO-mimics NC	TAO-hsa-miR-101-3p mimic
	0H	0.2571	0.2409	0.244			24H	0.4622	0.457	0.4043			48H	0.5622	0.56	0.471		72H	0.7631	0.7949	0.5654
		0.2539	0.2494	0.2484				0.4553	0.4523	0.4054				0.554	0.5566	0.4738			0.7658	0.8155	0.5486
		0.2455	0.2477	0.2421				0.458	0.4577	0.3917				0.5537	0.5627	0.4666			0.806	0.7703	0.579
		0.2531	0.2451	0.2452				0.4465	0.4546	0.3991				0.5568	0.563	0.4783			0.8032	0.8117	0.5867
		0.2475	0.2405	0.2396				0.4609	0.453	0.3962				0.5489	0.5511	0.4691			0.7613	0.7886	0.5538
		0.2542	0.2476	0.2476				0.4536	0.4451	0.4046				0.5546	0.5573	0.4774			0.7767	0.817	0.6036
		TAO							MEAN	SD
cell1	0H	0.2573	0.2495	0.2617	0.2588	0.2596	0.2536		0.25675	0.00446352
cell2		0.2685	0.2725	0.2769	0.2739	0.2643	0.2678		0.27065	0.00460684
cell3		0.2571	0.2539	0.2455	0.2531	0.2475	0.2542		0.251883	0.00442918
cell1	24H	0.4757	0.4842	0.48	0.4728	0.4773	0.4747		0.47745	0.00410695
cell2		0.4873	0.4895	0.4986	0.4939	0.4902	0.4908		0.491717	0.0039927
cell3		0.4622	0.4553	0.458	0.4465	0.4609	0.4536		0.456083	0.00570804
cell1	48H	0.5379	0.541	0.5343	0.539	0.533	0.5446		0.5383	0.00428299
cell2		0.6122	0.6192	0.6119	0.6123	0.6088	0.6176		0.613667	0.00392207
cell3		0.5622	0.554	0.5537	0.5568	0.5489	0.5546		0.555033	0.00436196
cell1	72H	0.7845	0.7931	0.7988	0.8355	0.8508	0.7923		0.809167	0.0271489
cell2		0.8853	0.9063	0.918	0.8448	0.8825	0.8577		0.882433	0.0278239
cell3		0.7631	0.7658	0.806	0.8032	0.7613	0.7767		0.77935	0.0202955
		TAO-mimics NC							MEAN	SD
cell1	0H	0.2535	0.2559	0.2633	0.2601	0.2578	0.258		0.2581	0.00338053
cell2		0.2642	0.2668	0.2704	0.2715	0.2733	0.2727		0.269817	0.0035852
cell3		0.2409	0.2494	0.2477	0.2451	0.2405	0.2476		0.2452	0.00374807
cell1	24H	0.4739	0.4718	0.4654	0.4761	0.4686	0.4807		0.47275	0.00543866
cell2		0.4891	0.4808	0.4879	0.483	0.4849	0.4972		0.48715	0.00579612
cell3		0.457	0.4523	0.4577	0.4546	0.453	0.4451		0.453283	0.00454023
cell1	48H	0.5669	0.552	0.5528	0.5496	0.5475	0.5675		0.55605	0.00883736
cell2		0.6319	0.633	0.6273	0.626	0.6335	0.6242		0.629317	0.00397463
cell3		0.56	0.5566	0.5627	0.563	0.5511	0.5573		0.55845	0.00447068
cell1	72H	0.8606	0.8305	0.84	0.8232	0.8217	0.8407		0.836117	0.0144343
cell2		0.8999	0.8611	0.9043	0.874	0.9252	0.8906		0.892517	0.022782
cell3		0.7949	0.8155	0.7703	0.8117	0.7886	0.817		0.799667	0.0184582
		TAO-hsa-miR-101-3p mimic							MEAN	SD
cell1	0H	0.2587	0.2526	0.2586	0.258	0.2487	0.256		0.255433	0.00402426
cell2		0.271	0.2641	0.2632	0.2719	0.262	0.2656		0.2663	0.00416845
cell3		0.244	0.2484	0.2421	0.2452	0.2396	0.2476		0.244483	0.00332651
cell1	24H	0.4163	0.4146	0.4043	0.3981	0.3953	0.4138		0.407067	0.00909784
cell2		0.4372	0.4401	0.4339	0.4453	0.4416	0.4309		0.438167	0.00526029
cell3		0.4043	0.4054	0.3917	0.3991	0.3962	0.4046		0.400217	0.00552573
cell1	48H	0.4691	0.4654	0.4658	0.4688	0.468	0.4591		0.466033	0.00372702
cell2		0.5282	0.5309	0.5173	0.5346	0.525	0.5203		0.52605	0.00651114
cell3		0.471	0.4738	0.4666	0.4783	0.4691	0.4774		0.4727	0.00464155
cell1	72H	0.6254	0.6042	0.6203	0.5829	0.5994	0.599		0.6052	0.0155333
cell2		0.6552	0.6887	0.6609	0.654	0.6708	0.6526		0.6637	0.0139485
cell3		0.5654	0.5486	0.579	0.5867	0.5538	0.6036		0.57285	0.0208886
		cell1	cell2	cell3	cell1	cell2	cell3	cell1	cell2	cell3
			TAO			mimic NC			mimic
	0H	0.2568	0.2707	0.2519	0.2581	0.2698	0.2452	0.2554	0.2663	0.2445
	24H	0.4775	0.4917	0.4561	0.4728	0.4872	0.4533	0.4071	0.4382	0.4002
	48H	0.5383	0.6137	0.555	0.5561	0.6293	0.5585	0.466	0.5261	0.4727
	72H	0.8092	0.8824	0.7794	0.8361	0.8925	0.7997	0.6052	0.6637	0.5729
