# Supplementary material for: miR-101-3p suppresses proliferation of orbital fibroblasts by targeting pentraxin-3 in thyroid eye disease
Source: PeerJ journal article supplement (doi:10.7717/peerj.18535), 2024-11-15
Supplement: Raw_data_1.zip [file Data analysis.xlsx]

## Sheet: Sheet1
	living cell（%）	Early phase apoptotic cell（%）	Later phase apoptotic cell（%）	Necrotic cells（%）		Apoptotic cell（%）
blank control	97.73	0.81	1.39	0.08		2.2
	97.84	0.69	1.26	0.22		1.95
	98.1	0.8	0.93	0.17		1.73
average	97.89	0.766667	1.19333	0.156667		1.96
stdev	0.19	0.0665833	0.237136	0.070946		0.23516
mimic NC	97.24	0.91	1.65	0.2		2.56
	97.04	0.83	1.91	0.21		2.74
	97.46	0.74	1.73	0.07		2.47
average	97.2467	0.826667	1.76333	0.16		2.59
stdev	0.210079	0.085049	0.133167	0.0781025		0.137477
miR-101-3p mimic	97.1	0.76	2.02	0.12		2.78
	97.08	0.78	1.99	0.14		2.77
	97.36	0.74	1.78	0.12		2.52
average	97.18	0.76	1.93	0.126667		2.69
stdev	0.156205	0.02	0.130767	0.011547		0.147309
