# Supplementary material for: miR-101-3p suppresses proliferation of orbital fibroblasts by targeting pentraxin-3 in thyroid eye disease
Source: PeerJ journal article supplement (doi:10.7717/peerj.18535), 2024-11-15
Supplement: Raw_data_1.zip [file Data analysis.xlsx]

## Sheet: Sheet1
Sample Name	Target Name	CT1	CT2	CT3	CT mean		NC1	NC2	NC3	NC4	NC5	NC6	NC7	NC8	NC9	NC10	TAO1	TAO2	TAO3	TAO4	TAO5	TAO6	TAO7	TAO8	TAO9	TAO10
NC1	GAPDH	15.9085	15.9138	15.8158	15.8794	GAPDH	15.8794	16.7941	17.013	16.2935	16.926	17.3632	18.1947	17.3006	16.2126	17.5848	16.6323	16.128	15.2314	17.6811	16.9204	15.6035	15.2346	14.3167	17.1142	16.4913
NC2	GAPDH	16.8285	16.839	16.7149	16.7941	PTX3	20.6893	20.7835	22.7828	21.7118	22.8352	24.9368	20.7813	22.7213	23.374	23.6815	19.2088	21.701	18.8302	19.6467	19.384	20.5531	18.6644	17.085	18.77	18.8206
NC3	GAPDH	16.9859	17.0281	17.0251	17.013
NC4	GAPDH	16.3615	16.3	16.219	16.2935	ΔCT	4.80998	3.98938	5.76973	5.4183	5.90921	7.57358	2.58661	5.42075	7.16142	6.09669	2.57651	5.57292	3.59879	1.96563	2.46356	4.94958	3.42981	2.76828	1.65577	2.3293
NC5	GAPDH	16.8815	16.9388	16.9577	16.926
NC6	GAPDH	17.3463	17.3743	17.369	17.3632	对照组ΔCT mean	5.47357
NC7	GAPDH	18.2542	18.1559	18.1741	18.1947
NC8	GAPDH	17.2996	17.3266	17.2756	17.3006	ΔΔCT	-0.663586	-1.48418	0.296162	-0.0552699	0.43564	2.10002	-2.88695	-0.0528155	1.68786	0.623127	-2.89705	0.0993541	-1.87478	-3.50794	-3.01001	-0.523986	-2.04375	-2.70528	-3.8178	-3.14427
NC9	GAPDH	16.2697	16.1815	16.1865	16.2126
NC10	GAPDH	17.609	17.6324	17.5131	17.5848	2^(-ΔΔCT)	1.58402	2.79758	0.814416	1.03905	0.739366	0.233255	7.39707	1.03729	0.310387	0.649262	7.44903	0.933451	3.66746	11.3761	8.0557	1.43792	4.12316	6.52186	14.1017	8.84137
TAO1	GAPDH	16.609	16.6716	16.6164	16.6323
TAO2	GAPDH	16.1233	16.1489	16.1119	16.128
TAO3	GAPDH	15.1437	15.2454	15.3052	15.2314
TAO4	GAPDH	17.656	17.6379	17.7494	17.6811
TAO5	GAPDH	16.906	16.9253	16.93	16.9204			NC	TAO
TAO6	GAPDH	15.6116	15.5937	15.6052	15.6035			1.58402	7.44903
TAO7	GAPDH	15.1849	15.253	15.2659	15.2346			2.79758	0.933451
TAO8	GAPDH	14.2694	14.3263	14.3544	14.3167			0.814416	3.66746
TAO9	GAPDH	17.0975	17.1069	17.1383	17.1142			1.03905	11.3761
TAO10	GAPDH	16.442	16.5106	16.5215	16.4913			0.739366	8.0557
								0.233255	1.43792
								7.39707	4.12316
								1.03729	6.52186
								0.310387	14.1017
								0.649262	8.84137
NC1	PTX3	20.618	20.636	20.814	20.6893
NC2	PTX3	20.6972	20.763	20.8903	20.7835
NC3	PTX3	22.6959	22.8382	22.8142	22.7828
NC4	PTX3	21.6178	21.8057	21.7118	21.7118
NC5	PTX3	22.8751	22.8694	22.761	22.8352
NC6	PTX3	24.9201	24.9635	24.9267	24.9368
NC7	PTX3	20.6725	20.7969	20.8747	20.7813
NC8	PTX3	22.6102	22.7672	22.7865	22.7213
NC9	PTX3	23.3157	23.4228	23.3834	23.374
NC10	PTX3	23.5536	23.7622	23.7287	23.6815
TAO1	PTX3	19.2291	19.233	19.1644	19.2088
TAO2	PTX3	21.7146	21.7573	21.6309	21.701
TAO3	PTX3	18.7397	18.8355	18.9155	18.8302
TAO4	PTX3	19.5685	19.619	19.7527	19.6467
TAO5	PTX3	19.4684	19.4635	19.2201	19.384
TAO6	PTX3	20.4714	20.587	20.6007	20.5531
TAO7	PTX3	18.6914	18.752	18.5498	18.6644
TAO8	PTX3	17.0867	17.1125	17.0558	17.085
TAO9	PTX3	18.7488	18.8019	18.7592	18.77
TAO10	PTX3	18.9012	18.8214	18.7394	18.8206
