# Supplementary material for: miR-101-3p suppresses proliferation of orbital fibroblasts by targeting pentraxin-3 in thyroid eye disease
Source: PeerJ journal article supplement (doi:10.7717/peerj.18535), 2024-11-15
Supplement: Raw_data_1.zip [file data analysis.xlsx]

## Sheet: Data analysis
F	H306+NC	H306+hsa-miR-101-3p	H32871+NC	H32871+hsa-miR-101-3p	H32872+NC	H32872+hsa-miR-101-3p
	22103180	22267914	52762858	39562231	41724620	33316582
	15017368	20400871	43839494	43705998	50758698	34893388
	21413447	22095065	43391081	39509052	46888761	37888606
R	10174000	10061383	12483418	12557169	10537787	8688245
	7040811	9451338	11211934	13872652	12679548	9081123
	9642529	11536875	10233144	14572230	12428307	10008721
F:R	2.17252	2.21321	4.22664	3.15057	3.95952	3.83467
	2.1329	2.15852	3.91007	3.15051	4.00319	3.84241
	2.22073	1.91517	4.24025	2.71126	3.77274	3.78556
mean	2.17538	2.09563	4.12565	3.00411	3.91182	3.82088
Standard variance	0.0439832	0.158659	0.186821	0.253622	0.12241	0.0308327
Deviation coefficient	0.0202186	0.0757092	0.0452827	0.0844248	0.0312924	0.00806953
normalization	0.998682	1.01739	1.02448	0.763653	1.0122	0.980279
	0.980473	0.992247	0.947747	0.76364	1.02336	0.982256
	1.02085	0.880382	1.02778	0.65717	0.964446	0.967723
	1	0.963339	1	0.728155	1	0.976753
		-0.0366613		-0.271845		-0.0232472
