# Supplementary material for: miR-101-3p suppresses proliferation of orbital fibroblasts by targeting pentraxin-3 in thyroid eye disease
Source: PeerJ journal article supplement (doi:10.7717/peerj.18535), 2024-11-15
Supplement: Raw_data_1.zip [file Data analysis.xlsx]

## Sheet: Sheet1
Well Position	Well	Sample Name	Target Name	CT	CT1	CT2	CT3	CT mean		blank1	NC1	mimic1	blank2	NC2	mimic2	blank3	NC3	mimic3
A1	1	blank1	U6	18.8657	18.8657	19.091	19.1629	19.0399	U6	19.0399	20.2331	19.4895	20.3583	20.0436	20.5458	18.0964	19.207	18.8648
A2	2	NC1	U6	20.0062	20.0062	20.2512	20.442	20.2331	miR-101-3p	27.586	28.5893	21.0618	28.5386	28.0564	22.2974	26.825	27.6397	20.6567
A3	3	mimic1	U6	19.5421	19.5421	19.4865	19.4398	19.4895
A4	4	blank2	U6	20.3173	20.3173	20.2308	20.5267	20.3583	ΔCT	8.54619	8.35621	1.57232	8.18029	8.01284	1.75167	8.72863	8.43264	1.79184
A5	5	NC2	U6	20.0337	20.0337	19.8814	20.2158	20.0436
A6	6	mimic2	U6	20.5534	20.5534	20.5067	20.5771	20.5458	对照组ΔCT mean	8.26723
A7	7	blank3	U6	18.143	18.143	17.9629	18.1833	18.0964
A8	8	NC3	U6	19.2292	19.2292	19.1338	19.2582	19.207	ΔΔCT	0.278963	0.0889798	-6.69491	-0.086936	-0.254393	-6.51556	0.461398	0.165414	-6.47539
A9	9	mimic3	U6	18.6902	18.6902	18.9113	18.993	18.8648
B1	10	blank1	U6	19.091					2^(-ΔΔCT)	0.824183	0.940187	103.602	1.06211	1.19283	91.4911	0.726282	0.891673	88.9785
B2	11	NC1	U6	20.2512
B3	12	mimic1	U6	19.4865
B4	13	blank2	U6	20.2308
B5	14	NC2	U6	19.8814									2^(-ΔΔCT)
B6	15	mimic2	U6	20.5067								blank	0.824183
B7	16	blank3	U6	17.9629									1.06211
B8	17	NC3	U6	19.1338									0.726282
B9	18	mimic3	U6	18.9113								NC	0.940187
C1	19	blank1	U6	19.1629									1.19283
C2	20	NC1	U6	20.442									0.891673
C3	21	mimic1	U6	19.4398								mimic	103.602
C4	22	blank2	U6	20.5267									91.4911
C5	23	NC2	U6	20.2158									88.9785
C6	24	mimic2	U6	20.5771
C7	25	blank3	U6	18.1833
C8	26	NC3	U6	19.2582
C9	27	mimic3	U6	18.993
D1	28	blank1	miR-101-3p	26.6431	26.6431	28.2184	27.8967	27.586
D2	29	NC1	miR-101-3p	28.6829	28.6829	28.5768	28.5083	28.5893
D3	30	mimic1	miR-101-3p	21.115	21.115	21.027	21.0434	21.0618
D4	31	blank2	miR-101-3p	28.5291	28.5291	28.6818	28.4048	28.5386
D5	32	NC2	miR-101-3p	28.0573	28.0573	28.1723	27.9397	28.0564
D6	33	mimic2	miR-101-3p	22.3679	22.3679	22.1012	22.4232	22.2974
D7	34	blank3	miR-101-3p	26.8901	26.8901	26.6712	26.9138	26.825
D8	35	NC3	miR-101-3p	27.6639	27.6639	27.5505	27.7047	27.6397
D9	36	mimic3	miR-101-3p	20.7353	20.7353	20.4463	20.7884	20.6567
E1	37	blank1	miR-101-3p	28.2184
E2	38	NC1	miR-101-3p	28.5768
E3	39	mimic1	miR-101-3p	21.027
E4	40	blank2	miR-101-3p	28.6818
E5	41	NC2	miR-101-3p	28.1723
E6	42	mimic2	miR-101-3p	22.1012
E7	43	blank3	miR-101-3p	26.6712
E8	44	NC3	miR-101-3p	27.5505
E9	45	mimic3	miR-101-3p	20.4463
F1	46	blank1	miR-101-3p	27.8967
F2	47	NC1	miR-101-3p	28.5083
F3	48	mimic1	miR-101-3p	21.0434
F4	49	blank2	miR-101-3p	28.4048
F5	50	NC2	miR-101-3p	27.9397
F6	51	mimic2	miR-101-3p	22.4232
F7	52	blank3	miR-101-3p	26.9138
F8	53	NC3	miR-101-3p	27.7047
F9	54	mimic3	miR-101-3p	20.7884
