# Supplementary material for: miR-101-3p suppresses proliferation of orbital fibroblasts by targeting pentraxin-3 in thyroid eye disease
Source: PeerJ journal article supplement (doi:10.7717/peerj.18535), 2024-11-15
Supplement: Raw_data_1.zip [file Data analysis.xlsx]

## Sheet: Sheet1
Sample Name	Target Name	CT1	CT2	CT3	CT mean		NC1	NC2	NC3	NC4	NC5	NC6	NC7	NC8	NC9	NC10	TAO1	TAO2	TAO3	TAO4	TAO5	TAO6	TAO7	TAO8	TAO9	TAO10
NC1	U6	19.442	19.5106	19.5215	19.4913	U6	19.4913	20.1142	18.3167	16.7346	19.6035	20.4204	19.6811	17.2314	20.128	20.6323	15.8794	16.7941	17.013	16.2935	14.926	17.3632	19.1947	17.3006	16.2126	17.5848
NC2	U6	20.0975	20.1069	20.1383	20.1142	miR-101-3p	8.68934	8.78351	8.78276	8.71178	8.83518	8.93675	8.78134	8.72131	8.37399	8.68151	8.82065	8.77	8.58501	8.66441	8.55305	8.38401	8.64674	8.83023	8.70095	8.70885
NC3	U6	18.2694	18.3263	18.3544	18.3167
NC4	U6	16.6849	16.753	16.7659	16.7346	ΔCT	-10.802	-11.3307	-9.53397	-8.02282	-10.7683	-11.4837	-10.8998	-8.51014	-11.754	-11.9508	-7.05872	-8.02413	-8.42802	-7.62908	-6.37292	-8.97916	-10.548	-8.47033	-7.51161	-8.87598
NC5	U6	19.6116	19.5937	19.6052	19.6035
NC6	U6	20.406	20.4253	20.43	20.4204	对照组ΔCT mean	-10.5056
NC7	U6	19.656	19.6379	19.7494	19.6811
NC8	U6	17.1437	17.2454	17.3052	17.2314	ΔΔCT	-0.296379	-0.825093	0.97166	2.48281	-0.262666	-0.978069	-0.394141	1.99549	-1.24842	-1.44519	3.44691	2.4815	2.0776	2.87655	4.13271	1.52646	-0.042368	2.0353	2.99402	1.62965
NC9	U6	20.1233	20.1489	20.1119	20.128
NC10	U6	20.609	20.6716	20.6164	20.6323	2^(-ΔΔCT)	1.22806	1.77165	0.509919	0.178895	1.19969	1.96983	1.31416	0.250783	2.37581	2.72299	0.0917017	0.179058	0.236908	0.136167	0.0570075	0.347127	1.0298	0.243957	0.125519	0.323166
TAO1	U6	15.9085	15.9138	15.8158	15.8794
TAO2	U6	16.8285	16.839	16.7149	16.7941
TAO3	U6	16.9859	17.0281	17.0251	17.013
TAO4	U6	16.3615	16.3	16.219	16.2935
TAO5	U6	14.8815	14.9388	14.9577	14.926				NC	TAO
TAO6	U6	17.3463	17.3743	17.369	17.3632				1.22806	0.0917017
TAO7	U6	19.2542	19.1559	19.1741	19.1947				1.77165	0.179058
TAO8	U6	17.2996	17.3266	17.2756	17.3006				0.509919	0.236908
TAO9	U6	16.2697	16.1815	16.1865	16.2126				0.178895	0.136167
TAO10	U6	17.609	17.6324	17.5131	17.5848				1.19969	0.0570075
									1.96983	0.347127
									1.31416	1.0298
									0.250783	0.243957
									2.37581	0.125519
									2.72299	0.323166
NC1	miR-101-3p	8.61804	8.63603	8.81395	8.68934
NC2	miR-101-3p	8.69716	8.76304	8.89033	8.78351
NC3	miR-101-3p	8.6959	8.83823	8.81415	8.78276
NC4	miR-101-3p	8.61778	8.80573	8.71183	8.71178
NC5	miR-101-3p	8.87512	8.86945	8.76097	8.83518
NC6	miR-101-3p	8.92012	8.96347	8.92667	8.93675
NC7	miR-101-3p	8.67247	8.79688	8.87468	8.78134
NC8	miR-101-3p	8.61023	8.76716	8.78654	8.72131
NC9	miR-101-3p	8.31575	8.42279	8.38342	8.37399
NC10	miR-101-3p	8.55364	8.76221	8.72869	8.68151
TAO1	miR-101-3p	8.90117	8.82139	8.73937	8.82065
TAO2	miR-101-3p	8.74883	8.80191	8.75925	8.77
TAO3	miR-101-3p	8.5867	8.61249	8.55584	8.58501
TAO4	miR-101-3p	8.69139	8.75199	8.54984	8.66441
TAO5	miR-101-3p	8.47145	8.58702	8.60069	8.55305
TAO6	miR-101-3p	8.46844	8.46352	8.22006	8.38401
TAO7	miR-101-3p	8.56851	8.619	8.7527	8.64674
TAO8	miR-101-3p	8.73965	8.83554	8.91551	8.83023
TAO9	miR-101-3p	8.71464	8.75728	8.63094	8.70095
TAO10	miR-101-3p	8.72913	8.73301	8.6644	8.70885
