# Supplementary material for: miR-101-3p suppresses proliferation of orbital fibroblasts by targeting pentraxin-3 in thyroid eye disease
Source: PeerJ journal article supplement (doi:10.7717/peerj.18535), 2024-11-15
Supplement: Raw_data_1.zip [file H32871.docx]

H32871 Plasmid specification

# 1. Sample information

| Clone line number： | H32871 | Gene name： | PTX3 | |
| --- | --- | --- | --- | --- |
| GenBank ID： | NM_002852.4 | Gene size： | 654 | |
| species： | Human | Upstream and downstream clonase cleavage sites | MluI | HindIII |
| Prokaryotic resistance： | Amp | | | |
| Empty vector name： | H306 pMIR-REPORT Luciferase | | | |
| Post build name： | pMIR-REPORT Luciferase-PTX3 3'UTR(WT) | | | |
| Forward sequencing primer： | Luc-C-F GAGGAGTTGTGTTTGTGGAC | | | |
| Reverse sequencing primer： | M13F TGTAAAACGACGGCCAGT | | | |
| Other instructions |  | | | |

# Empty vector profile (before inserting target gene)

|  |
| --- |

# Comprehensive plasmid profile：

|  |
| --- |
