# Supplementary material for: miR-101-3p suppresses proliferation of orbital fibroblasts by targeting pentraxin-3 in thyroid eye disease
Source: PeerJ journal article supplement (doi:10.7717/peerj.18535), 2024-11-15
Supplement: Raw_data_1.zip [file raw data.xlsx]

## Sheet: Sheet1
Well Position	Well	Sample Name	Target Name	CT
A1	1	blank①	U6	20.375
A2	2	NC①	U6	21.6067
A3	3	mimic①	U6	21.1055
A4	4	mimic+rhPTX3①	U6	21.2621
A5	5	blank②	U6	21.1332
A6	6	NC②	U6	21.0354
A7	7	mimic②	U6	21.5811
A8	8	mimic+rhPTX3②	U6	21.3947
A9	9	blank③	U6	20.0573
A10	10	NC③	U6	21.1521
A11	11	mimic③	U6	20.4592
A12	12	mimic+rhPTX3③	U6	20.5762
B1	13	blank①	U6	20.6183
B2	14	NC①	U6	21.8713
B3	15	mimic①	U6	21.0454
B4	16	mimic+rhPTX3①	U6	21.0989
B5	17	blank②	U6	21.1423
B6	18	NC②	U6	20.8754
B7	19	mimic②	U6	21.5321
B8	20	mimic+rhPTX3②	U6	21.5359
B9	21	blank③	U6	19.8592
B10	22	NC③	U6	21.0471
B11	23	mimic③	U6	20.6024
B12	24	mimic+rhPTX3③	U6	20.7268
C1	25	blank①	U6	20.6959
C2	26	NC①	U6	22.0774
C3	27	mimic①	U6	20.995
C4	28	mimic+rhPTX3①	U6	21.4571
C5	29	blank②	U6	21.253
C6	30	NC②	U6	21.2266
C7	31	mimic②	U6	21.606
C8	32	mimic+rhPTX3②	U6	21.5465
C9	33	blank③	U6	20.1016
C10	34	NC③	U6	21.184
C11	35	mimic③	U6	20.5923
C12	36	mimic+rhPTX3③	U6	20.8068
D1	37	blank①	miR-101-3p	29.7745
D2	38	NC①	miR-101-3p	30.9776
D3	39	mimic①	miR-101-3p	23.7042
D4	40	mimic+rhPTX3①	miR-101-3p	23.8818
D5	41	blank②	miR-101-3p	29.9555
D6	42	NC②	miR-101-3p	29.6601
D7	43	mimic②	miR-101-3p	23.9863
D8	44	mimic+rhPTX3②	miR-101-3p	23.8285
D9	45	blank③	miR-101-3p	29.1791
D10	46	NC③	miR-101-3p	30.3303
D11	47	mimic③	miR-101-3p	22.9088
D12	48	mimic+rhPTX3③	miR-101-3p	23.273
E1	49	blank①	miR-101-3p	29.4758
E2	50	NC①	miR-101-3p	30.8629
E3	51	mimic①	miR-101-3p	23.6091
E4	52	mimic+rhPTX3①	miR-101-3p	23.7895
E5	53	blank②	miR-101-3p	30.1159
E6	54	NC②	miR-101-3p	29.7809
E7	55	mimic②	miR-101-3p	23.8062
E8	56	mimic+rhPTX3②	miR-101-3p	23.9275
E9	57	blank③	miR-101-3p	29.0383
E10	58	NC③	miR-101-3p	30.2055
E11	59	mimic③	miR-101-3p	22.8909
E12	60	mimic+rhPTX3③	miR-101-3p	23.2075
F1	61	blank①	miR-101-3p	30.1285
F2	62	NC①	miR-101-3p	30.789
F3	63	mimic①	miR-101-3p	23.6269
F4	64	mimic+rhPTX3①	miR-101-3p	23.8067
F5	65	blank②	miR-101-3p	29.825
F6	66	NC②	miR-101-3p	29.5367
F7	67	mimic②	miR-101-3p	23.9444
F8	68	mimic+rhPTX3②	miR-101-3p	23.9605
F9	69	blank③	miR-101-3p	29.1052
F10	70	NC③	miR-101-3p	30.3752
F11	71	mimic③	miR-101-3p	22.9672
F12	72	mimic+rhPTX3③	miR-101-3p	23.1525
