# Supplementary material for: miR-101-3p suppresses proliferation of orbital fibroblasts by targeting pentraxin-3 in thyroid eye disease
Source: PeerJ journal article supplement (doi:10.7717/peerj.18535), 2024-11-15
Supplement: Raw_data_1.zip [file raw data.xlsx]

## Sheet: Sheet1
Well Position	Well	Sample Name	Target Name	CT
A1	1	blank1	GAPDH	15.6164
A2	2	NC1	GAPDH	15.5087
A3	3	mimic1	GAPDH	15.7441
A4	4	blank2	GAPDH	15.3173
A5	5	NC2	GAPDH	15.3337
A6	6	mimic2	GAPDH	15.5534
A7	7	blank3	GAPDH	16.143
A8	8	NC3	GAPDH	16.2292
A9	9	mimic3	GAPDH	16.1902
B1	10	blank1	GAPDH	15.6234
B2	11	NC1	GAPDH	15.3423
B3	12	mimic1	GAPDH	15.7647
B4	13	blank2	GAPDH	15.2308
B5	14	NC2	GAPDH	15.1814
B6	15	mimic2	GAPDH	15.5067
B7	16	blank3	GAPDH	15.9629
B8	17	NC3	GAPDH	16.1338
B9	18	mimic3	GAPDH	16.2113
C1	19	blank1	GAPDH	15.7355
C2	20	NC1	GAPDH	15.4945
C3	21	mimic1	GAPDH	15.824
C4	22	blank2	GAPDH	15.5267
C5	23	NC2	GAPDH	15.2158
C6	24	mimic2	GAPDH	15.5771
C7	25	blank3	GAPDH	16.1833
C8	26	NC3	GAPDH	16.2582
C9	27	mimic3	GAPDH	16.323
D1	28	blank1	PTX3	21.6667
D2	29	NC1	PTX3	21.8618
D3	30	mimic1	PTX3	23.1143
D4	31	blank2	PTX3	21.3291
D5	32	NC2	PTX3	21.2573
D6	33	mimic2	PTX3	22.3679
D7	34	blank3	PTX3	22.1901
D8	35	NC3	PTX3	22.4839
D9	36	mimic3	PTX3	23.1353
E1	37	blank1	PTX3	22.2834
E2	38	NC1	PTX3	21.916
E3	39	mimic1	PTX3	22.8551
E4	40	blank2	PTX3	21.4818
E5	41	NC2	PTX3	21.3723
E6	42	mimic2	PTX3	22.1012
E7	43	blank3	PTX3	21.9712
E8	44	NC3	PTX3	22.3705
E9	45	mimic3	PTX3	23.0463
F1	46	blank1	PTX3	21.9594
F2	47	NC1	PTX3	21.6302
F3	48	mimic1	PTX3	22.7116
F4	49	blank2	PTX3	21.2048
F5	50	NC2	PTX3	21.1397
F6	51	mimic2	PTX3	22.4232
F7	52	blank3	PTX3	22.2138
F8	53	NC3	PTX3	22.5247
F9	54	mimic3	PTX3	23.2884
