# Supplementary material for: miR-101-3p suppresses proliferation of orbital fibroblasts by targeting pentraxin-3 in thyroid eye disease
Source: PeerJ journal article supplement (doi:10.7717/peerj.18535), 2024-11-15
Supplement: Raw_data_1.zip [file raw data.xlsx]

## Sheet: Sheet1
	living cell（%）	Early phase apoptotic cell（%）	Later phase apoptotic cell（%）	Necrotic cells（%）		Apoptotic cell（%）
blank control1	97.73	0.81	1.39	0.08		2.2
blank control2	97.84	0.69	1.26	0.22		1.95
blank control3	98.1	0.8	0.93	0.17		1.73
mimic NC1	97.24	0.91	1.65	0.2		2.56
mimic NC2	97.04	0.83	1.91	0.21		2.74
mimic NC3	97.46	0.74	1.73	0.07		2.47
miR-101-3p mimic1	97.1	0.76	2.02	0.12		2.78
miR-101-3p mimic2	97.08	0.78	1.99	0.14		2.77
miR-101-3p mimic3	97.36	0.74	1.78	0.12		2.52
