# Supplementary material for: miR-101-3p suppresses proliferation of orbital fibroblasts by targeting pentraxin-3 in thyroid eye disease
Source: PeerJ journal article supplement (doi:10.7717/peerj.18535), 2024-11-15
Supplement: Raw_data_1.zip [file raw data.xlsx]

## Sheet: raw data
F	H306+NC	H306+hsa-miR-101-3p	H32871+NC	H32871+hsa-miR-101-3p	H32872+NC	H32872+hsa-miR-101-3p
	22103180	22267914	52762858	39562231	41724620	33316582
	15017368	20400871	43839494	43705998	50758698	34893388
	21413447	22095065	43391081	39509052	46888761	37888606
R	10174000	10061383	12483418	12557169	10537787	8688245
	7040811	9451338	11211934	13872652	12679548	9081123
	9642529	11536875	10233144	14572230	12428307	10008721
