# Supplementary material for: miR-101-3p suppresses proliferation of orbital fibroblasts by targeting pentraxin-3 in thyroid eye disease
Source: PeerJ journal article supplement (doi:10.7717/peerj.18535), 2024-11-15
Supplement: Raw_data_1.zip [file raw data.xlsx]

## Sheet: Sheet1
Well Position	Well	Sample Name	Target Name	CT
A1	1	NC1	U6	12.4201
A2	2	NC2	U6	13.1077
A3	3	NC3	U6	12.3617
A4	4	NC4	U6	13.6276
A5	5	NC5	U6	12.9068
A6	6	NC6	U6	12.171
A7	7	TAO1	U6	11.881
A8	8	TAO2	U6	11.7343
A9	9	TAO3	U6	12.2607
A10	10	TAO4	U6	11.5653
A11	11	TAO5	U6	10.677
A12	12	TAO6	U6	11.0238
B1	13	NC1	U6	12.3505
B2	14	NC2	U6	13.0015
B3	15	NC3	U6	12.2953
B4	16	NC4	U6	13.5921
B5	17	NC5	U6	12.8125
B6	18	NC6	U6	12.2602
B7	19	TAO1	U6	11.9365
B8	20	TAO2	U6	11.6141
B9	21	TAO3	U6	12.3013
B10	22	TAO4	U6	11.4593
B11	23	TAO5	U6	10.7602
B12	24	TAO6	U6	11.0944
C1	25	NC1	U6	12.3868
C2	26	NC2	U6	12.9558
C3	27	NC3	U6	12.3505
C4	28	NC4	U6	13.4639
C5	29	NC5	U6	12.7691
C6	30	NC6	U6	12.0812
C7	31	TAO1	U6	11.8979
C8	32	TAO2	U6	11.5464
C9	33	TAO3	U6	12.2194
C10	34	TAO4	U6	11.5023
C11	35	TAO5	U6	10.8039
C12	36	TAO6	U6	10.7504
D1	37	NC1	miR-101-3p	11.276
D2	38	NC2	miR-101-3p	11.0724
D3	39	NC3	miR-101-3p	10.7739
D4	40	NC4	miR-101-3p	11.5612
D5	41	NC5	miR-101-3p	11.3772
D6	42	NC6	miR-101-3p	10.5839
D7	43	TAO1	miR-101-3p	11.0847
D8	44	TAO2	miR-101-3p	10.9371
D9	45	TAO3	miR-101-3p	10.9663
D10	46	TAO4	miR-101-3p	10.1866
D11	47	TAO5	miR-101-3p	9.7837
D12	48	TAO6	miR-101-3p	10.2733
E1	49	NC1	miR-101-3p	11.1513
E2	50	NC2	miR-101-3p	10.967
E3	51	NC3	miR-101-3p	10.6515
E4	52	NC4	miR-101-3p	11.439
E5	53	NC5	miR-101-3p	11.241
E6	54	NC6	miR-101-3p	10.4877
E7	55	TAO1	miR-101-3p	11.234
E8	56	TAO2	miR-101-3p	10.9572
E9	57	TAO3	miR-101-3p	11.0049
E10	58	TAO4	miR-101-3p	10.1188
E11	59	TAO5	miR-101-3p	9.6733
E12	60	TAO6	miR-101-3p	10.3922
F1	61	NC1	miR-101-3p	10.9236
F2	62	NC2	miR-101-3p	11.0433
F3	63	NC3	miR-101-3p	10.7089
F4	64	NC4	miR-101-3p	11.333
F5	65	NC5	miR-101-3p	11.2236
F6	66	NC6	miR-101-3p	10.4534
F7	67	TAO1	miR-101-3p	11.168
F8	68	TAO2	miR-101-3p	10.9425
F9	69	TAO3	miR-101-3p	11.1136
F10	70	TAO4	miR-101-3p	10.0572
F11	71	TAO5	miR-101-3p	9.82255
F12	72	TAO6	miR-101-3p	10.361
