# Supplementary material for: miR-101-3p suppresses proliferation of orbital fibroblasts by targeting pentraxin-3 in thyroid eye disease
Source: PeerJ journal article supplement (doi:10.7717/peerj.18535), 2024-11-15
Supplement: Raw_data_1.zip [file raw data.xlsx]

## Sheet: Sheet1
Well Position	Well	Sample Name	Target Name	CT
A1	1	blank1	U6	18.8657
A2	2	NC1	U6	20.0062
A3	3	mimic1	U6	19.5421
A4	4	blank2	U6	20.3173
A5	5	NC2	U6	20.0337
A6	6	mimic2	U6	20.5534
A7	7	blank3	U6	18.143
A8	8	NC3	U6	19.2292
A9	9	mimic3	U6	18.6902
B1	10	blank1	U6	19.091
B2	11	NC1	U6	20.2512
B3	12	mimic1	U6	19.4865
B4	13	blank2	U6	20.2308
B5	14	NC2	U6	19.8814
B6	15	mimic2	U6	20.5067
B7	16	blank3	U6	17.9629
B8	17	NC3	U6	19.1338
B9	18	mimic3	U6	18.9113
C1	19	blank1	U6	19.1629
C2	20	NC1	U6	20.442
C3	21	mimic1	U6	19.4398
C4	22	blank2	U6	20.5267
C5	23	NC2	U6	20.2158
C6	24	mimic2	U6	20.5771
C7	25	blank3	U6	18.1833
C8	26	NC3	U6	19.2582
C9	27	mimic3	U6	18.993
D1	28	blank1	miR-101-3p	26.6431
D2	29	NC1	miR-101-3p	28.6829
D3	30	mimic1	miR-101-3p	21.115
D4	31	blank2	miR-101-3p	28.5291
D5	32	NC2	miR-101-3p	28.0573
D6	33	mimic2	miR-101-3p	22.3679
D7	34	blank3	miR-101-3p	26.8901
D8	35	NC3	miR-101-3p	27.6639
D9	36	mimic3	miR-101-3p	20.7353
E1	37	blank1	miR-101-3p	28.2184
E2	38	NC1	miR-101-3p	28.5768
E3	39	mimic1	miR-101-3p	21.027
E4	40	blank2	miR-101-3p	28.6818
E5	41	NC2	miR-101-3p	28.1723
E6	42	mimic2	miR-101-3p	22.1012
E7	43	blank3	miR-101-3p	26.6712
E8	44	NC3	miR-101-3p	27.5505
E9	45	mimic3	miR-101-3p	20.4463
F1	46	blank1	miR-101-3p	27.8967
F2	47	NC1	miR-101-3p	28.5083
F3	48	mimic1	miR-101-3p	21.0434
F4	49	blank2	miR-101-3p	28.4048
F5	50	NC2	miR-101-3p	27.9397
F6	51	mimic2	miR-101-3p	22.4232
F7	52	blank3	miR-101-3p	26.9138
F8	53	NC3	miR-101-3p	27.7047
F9	54	mimic3	miR-101-3p	20.7884
