# Supplementary material for: miR-101-3p suppresses proliferation of orbital fibroblasts by targeting pentraxin-3 in thyroid eye disease
Source: PeerJ journal article supplement (doi:10.7717/peerj.18535), 2024-11-15
Supplement: Raw_data_1.zip [file raw data1.xlsx]

## Sheet: Sheet1
Well Position	Well	Sample Name	Target Name	CT
B1	13	NC1	U6	19.442
B2	14	NC1	U6	19.5106
B3	15	NC1	U6	19.5215
B4	16	NC2	U6	20.0975
B5	17	NC2	U6	20.1069
B6	18	NC2	U6	20.1383
B7	19	NC3	U6	18.2694
B8	20	NC3	U6	18.3263
B9	21	NC3	U6	18.3544
B10	22	NC4	U6	16.6849
B11	23	NC4	U6	16.753
B12	24	NC4	U6	16.7659
C1	25	NC5	U6	19.6116
C2	26	NC5	U6	19.5937
C3	27	NC5	U6	19.6052
C4	28	TAO1	U6	15.9085
C5	29	TAO1	U6	15.9138
C6	30	TAO1	U6	15.8158
C7	31	TAO2	U6	16.8285
C8	32	TAO2	U6	16.839
C9	33	TAO2	U6	16.7149
C10	34	TAO3	U6	16.9859
C11	35	TAO3	U6	17.0281
C12	36	TAO3	U6	17.0251
D1	37	TAO4	U6	16.3615
D2	38	TAO4	U6	16.3
D3	39	TAO4	U6	16.219
D4	40	TAO5	U6	14.8815
D5	41	TAO5	U6	14.9388
D6	42	TAO5	U6	14.9577
E1	49	NC1	miR-101-3p	8.61804
E2	50	NC1	miR-101-3p	8.63603
E3	51	NC1	miR-101-3p	8.81395
E4	52	NC2	miR-101-3p	8.69716
E5	53	NC2	miR-101-3p	8.76304
E6	54	NC2	miR-101-3p	8.89033
E7	55	NC3	miR-101-3p	8.6959
E8	56	NC3	miR-101-3p	8.83823
E9	57	NC3	miR-101-3p	8.81415
E10	58	NC4	miR-101-3p	8.61778
E11	59	NC4	miR-101-3p	8.80573
E12	60	NC4	miR-101-3p	8.71183
F1	61	NC5	miR-101-3p	8.87512
F2	62	NC5	miR-101-3p	8.86945
F3	63	NC5	miR-101-3p	8.76097
F4	64	TAO1	miR-101-3p	8.90117
F5	65	TAO1	miR-101-3p	8.82139
F6	66	TAO1	miR-101-3p	8.73937
F7	67	TAO2	miR-101-3p	8.74883
F8	68	TAO2	miR-101-3p	8.80191
F9	69	TAO2	miR-101-3p	8.75925
F10	70	TAO3	miR-101-3p	8.5867
F11	71	TAO3	miR-101-3p	8.61249
F12	72	TAO3	miR-101-3p	8.55584
G1	73	TAO4	miR-101-3p	8.69139
G2	74	TAO4	miR-101-3p	8.75199
G3	75	TAO4	miR-101-3p	8.54984
G4	76	TAO5	miR-101-3p	8.47145
G5	77	TAO5	miR-101-3p	8.58702
G6	78	TAO5	miR-101-3p	8.60069
