# Supplementary material for: miR-101-3p suppresses proliferation of orbital fibroblasts by targeting pentraxin-3 in thyroid eye disease
Source: PeerJ journal article supplement (doi:10.7717/peerj.18535), 2024-11-15
Supplement: Raw_data_1.zip [file raw data1.xlsx]

## Sheet: Sheet1
Well Position	Well	Sample Name	Target Name	CT
B1	13	NC1	GAPDH	15.9085
B2	14	NC1	GAPDH	15.9138
B3	15	NC1	GAPDH	15.8158
B4	16	NC2	GAPDH	16.8285
B5	17	NC2	GAPDH	16.839
B6	18	NC2	GAPDH	16.7149
B7	19	NC3	GAPDH	16.9859
B8	20	NC3	GAPDH	17.0281
B9	21	NC3	GAPDH	17.0251
B10	22	NC4	GAPDH	16.3615
B11	23	NC4	GAPDH	16.3
B12	24	NC4	GAPDH	16.219
C1	25	NC5	GAPDH	16.8815
C2	26	NC5	GAPDH	16.9388
C3	27	NC5	GAPDH	16.9577
C4	28	TAO1	GAPDH	16.609
C5	29	TAO1	GAPDH	16.6716
C6	30	TAO1	GAPDH	16.6164
C7	31	TAO2	GAPDH	16.1233
C8	32	TAO2	GAPDH	16.1489
C9	33	TAO2	GAPDH	16.1119
C10	34	TAO3	GAPDH	15.1437
C11	35	TAO3	GAPDH	15.2454
C12	36	TAO3	GAPDH	15.3052
D1	37	TAO4	GAPDH	17.656
D2	38	TAO4	GAPDH	17.6379
D3	39	TAO4	GAPDH	17.7494
D4	40	TAO5	GAPDH	16.906
D5	41	TAO5	GAPDH	16.9253
D6	42	TAO5	GAPDH	16.93
E1	49	NC1	PTX3	20.618
E2	50	NC1	PTX3	20.636
E3	51	NC1	PTX3	20.814
E4	52	NC2	PTX3	20.6972
E5	53	NC2	PTX3	20.763
E6	54	NC2	PTX3	20.8903
E7	55	NC3	PTX3	22.6959
E8	56	NC3	PTX3	22.8382
E9	57	NC3	PTX3	22.8142
E10	58	NC4	PTX3	21.6178
E11	59	NC4	PTX3	21.8057
E12	60	NC4	PTX3	21.7118
F1	61	NC5	PTX3	22.8751
F2	62	NC5	PTX3	22.8694
F3	63	NC5	PTX3	22.761
F4	64	TAO1	PTX3	19.2291
F5	65	TAO1	PTX3	19.233
F6	66	TAO1	PTX3	19.1644
F7	67	TAO2	PTX3	21.7146
F8	68	TAO2	PTX3	21.7573
F9	69	TAO2	PTX3	21.6309
F10	70	TAO3	PTX3	18.7397
F11	71	TAO3	PTX3	18.8355
F12	72	TAO3	PTX3	18.9155
G1	73	TAO4	PTX3	19.5685
G2	74	TAO4	PTX3	19.619
G3	75	TAO4	PTX3	19.7527
G4	76	TAO5	PTX3	19.4684
G5	77	TAO5	PTX3	19.4635
G6	78	TAO5	PTX3	19.2201
