# Supplementary material for: miR-101-3p suppresses proliferation of orbital fibroblasts by targeting pentraxin-3 in thyroid eye disease
Source: PeerJ journal article supplement (doi:10.7717/peerj.18535), 2024-11-15
Supplement: Raw_data_1.zip [file raw data2.xlsx]

## Sheet: Sheet1
Well Position	Well	Sample Name	Target Name	CT
B1	13	NC6	GAPDH	17.3463
B2	14	NC6	GAPDH	17.3743
B3	15	NC6	GAPDH	17.369
B4	16	NC7	GAPDH	18.2542
B5	17	NC7	GAPDH	18.1559
B6	18	NC7	GAPDH	18.1741
B7	19	NC8	GAPDH	17.2996
B8	20	NC8	GAPDH	17.3266
B9	21	NC8	GAPDH	17.2756
B10	22	NC9	GAPDH	16.2697
B11	23	NC9	GAPDH	16.1815
B12	24	NC9	GAPDH	16.1865
C1	25	NC10	GAPDH	17.609
C2	26	NC10	GAPDH	17.6324
C3	27	NC10	GAPDH	17.5131
C4	28	TAO6	GAPDH	15.6116
C5	29	TAO6	GAPDH	15.5937
C6	30	TAO6	GAPDH	15.6052
C7	31	TAO7	GAPDH	15.1849
C8	32	TAO7	GAPDH	15.253
C9	33	TAO7	GAPDH	15.2659
C10	34	TAO8	GAPDH	14.2694
C11	35	TAO8	GAPDH	14.3263
C12	36	TAO8	GAPDH	14.3544
D1	37	TAO9	GAPDH	17.0975
D2	38	TAO9	GAPDH	17.1069
D3	39	TAO9	GAPDH	17.1383
D4	40	TAO10	GAPDH	16.442
D5	41	TAO10	GAPDH	16.5106
D6	42	TAO10	GAPDH	16.5215
E1	49	NC6	PTX3	24.9201
E2	50	NC6	PTX3	24.9635
E3	51	NC6	PTX3	24.9267
E4	52	NC7	PTX3	20.6725
E5	53	NC7	PTX3	20.7969
E6	54	NC7	PTX3	20.8747
E7	55	NC8	PTX3	22.6102
E8	56	NC8	PTX3	22.7672
E9	57	NC8	PTX3	22.7865
E10	58	NC9	PTX3	23.3157
E11	59	NC9	PTX3	23.4228
E12	60	NC9	PTX3	23.3834
F1	61	NC10	PTX3	23.5536
F2	62	NC10	PTX3	23.7622
F3	63	NC10	PTX3	23.7287
F4	64	TAO6	PTX3	20.4714
F5	65	TAO6	PTX3	20.587
F6	66	TAO6	PTX3	20.6007
F7	67	TAO7	PTX3	18.6914
F8	68	TAO7	PTX3	18.752
F9	69	TAO7	PTX3	18.5498
F10	70	TAO8	PTX3	17.0867
F11	71	TAO8	PTX3	17.1125
F12	72	TAO8	PTX3	17.0558
G1	73	TAO9	PTX3	18.7488
G2	74	TAO9	PTX3	18.8019
G3	75	TAO9	PTX3	18.7592
G4	76	TAO10	PTX3	18.9012
G5	77	TAO10	PTX3	18.8214
G6	78	TAO10	PTX3	18.7394
