# Supplementary material for: miR-101-3p suppresses proliferation of orbital fibroblasts by targeting pentraxin-3 in thyroid eye disease
Source: PeerJ journal article supplement (doi:10.7717/peerj.18535), 2024-11-15
Supplement: Raw_data_1.zip [file raw data2.xlsx]

## Sheet: Sheet1
Well Position	Well	Sample Name	Target Name	CT
B1	13	NC6	U6	20.406
B2	14	NC6	U6	20.4253
B3	15	NC6	U6	20.43
B4	16	NC7	U6	19.656
B5	17	NC7	U6	19.6379
B6	18	NC7	U6	19.7494
B7	19	NC8	U6	17.1437
B8	20	NC8	U6	17.2454
B9	21	NC8	U6	17.3052
B10	22	NC9	U6	20.1233
B11	23	NC9	U6	20.1489
B12	24	NC9	U6	20.1119
C1	25	NC10	U6	20.609
C2	26	NC10	U6	20.6716
C3	27	NC10	U6	20.6164
C4	28	TAO6	U6	17.3463
C5	29	TAO6	U6	17.3743
C6	30	TAO6	U6	17.369
C7	31	TAO7	U6	19.2542
C8	32	TAO7	U6	19.1559
C9	33	TAO7	U6	19.1741
C10	34	TAO8	U6	17.2996
C11	35	TAO8	U6	17.3266
C12	36	TAO8	U6	17.2756
D1	37	TAO9	U6	16.2697
D2	38	TAO9	U6	16.1815
D3	39	TAO9	U6	16.1865
D4	40	TAO10	U6	17.609
D5	41	TAO10	U6	17.6324
D6	42	TAO10	U6	17.5131
E1	49	NC6	miR-101-3p	8.92012
E2	50	NC6	miR-101-3p	8.96347
E3	51	NC6	miR-101-3p	8.92667
E4	52	NC7	miR-101-3p	8.67247
E5	53	NC7	miR-101-3p	8.79688
E6	54	NC7	miR-101-3p	8.87468
E7	55	NC8	miR-101-3p	8.61023
E8	56	NC8	miR-101-3p	8.76716
E9	57	NC8	miR-101-3p	8.78654
E10	58	NC9	miR-101-3p	8.31575
E11	59	NC9	miR-101-3p	8.42279
E12	60	NC9	miR-101-3p	8.38342
F1	61	NC10	miR-101-3p	8.55364
F2	62	NC10	miR-101-3p	8.76221
F3	63	NC10	miR-101-3p	8.72869
F4	64	TAO6	miR-101-3p	8.46844
F5	65	TAO6	miR-101-3p	8.46352
F6	66	TAO6	miR-101-3p	8.22006
F7	67	TAO7	miR-101-3p	8.56851
F8	68	TAO7	miR-101-3p	8.619
F9	69	TAO7	miR-101-3p	8.7527
F10	70	TAO8	miR-101-3p	8.73965
F11	71	TAO8	miR-101-3p	8.83554
F12	72	TAO8	miR-101-3p	8.91551
G1	73	TAO9	miR-101-3p	8.71464
G2	74	TAO9	miR-101-3p	8.75728
G3	75	TAO9	miR-101-3p	8.63094
G4	76	TAO10	miR-101-3p	8.72913
G5	77	TAO10	miR-101-3p	8.73301
G6	78	TAO10	miR-101-3p	8.6644
