# Supplementary material for: miR-101-3p suppresses proliferation of orbital fibroblasts by targeting pentraxin-3 in thyroid eye disease
Source: PeerJ journal article supplement (doi:10.7717/peerj.18535), 2024-11-15
Supplement: Raw_data_1.zip [file Sequencing analysis.docx]

GACGCAAGAAAAATCAGAGAGATCCTCATAAAGGCCAAGAAGGGCGGAAAGTCCAAATTGCTCGAGTGATGAAAGCTGCGCACTAGTGAGGGAGCTCATAGGCCGGCATAGACGCGTATGTTGTGAAACTCCACTTGAAGCCAAAGAAAGAAACTCACACTTAAAACACATGCCAGTTGGGAAGGTCTGAAAACTCAGTGCATAATAGGAACACTTGAGACTAATGAAAGAGAGAGTTGAGACCAATCTTTATTTGTACTGGCCAAATACTGAATAAACAGTTGAAGGAAAGACATTGGAAAAAGCTTTTGAGGATAATGTTACTAGACTTTATGCCATGGTGCTTTCAGTTTAATGCTGTGTCTCTGTCAGATAAACTCTCAAATAATTAAAAAGGACTGTATTGTTGAACAGAGGGACAATTGTTTTACTTTTCTTTGGTTAATTTTGTTTTGGCCAGAGATGAATTTTACATTGGAAGAATAACAAAATAAGATTTGTTGTCCATTGTTCATTGTTATTGGTATGTACCTTATTACAAAAAAAAGATGAAAACATATTTATACTACAAGGTGACTTAACAACTATAAATGTAGTTTATGTGTTATAATCGAATGTCACGTTTTTGAGAAGATAGTCATATAAGTTATATTGCAAAAGGGATTTGTATTAATTTAAGACTATTTTTGTAAAGCTCTACTGTAAATAAAATATTTTATAAAACTAGCTCACGTCATTTAATTATAAATTTAAGAGATGTTTTGGAGCAAAAAGCTTAATAAAGGATCTTTTATTTTCATTGGATCTGTGTGTTGGTTTTTTGTATGCGGCCGCTAGCTTGGCACTGGCCGTCGTTTTACAACGTCGTGACTGGGAAAACCCT

1 50

SEQ (1) GACGCAAGAAAAATCAGAGAGATCCTCATAAAGGCCAAGAAGGGCGGAAA

PTX3 3'UTR(WT) (1) --------------------------------------------------

51 100

SEQ (51) GTCCAAATTGCTCGAGTGATGAAAGCTGCGCACTAGTGAGGGAGCTCATA

PTX3 3'UTR(WT) (1) --------------------------------------------------

101 150

SEQ (101) GGCCGGCATAGACGCGTATGTTGTGAAACTCCACTTGAAGCCAAAGAAAG

PTX3 3'UTR(WT) (1) -----------------ATGTTGTGAAACTCCACTTGAAGCCAAAGAAAG

151 200

SEQ (151) AAACTCACACTTAAAACACATGCCAGTTGGGAAGGTCTGAAAACTCAGTG

PTX3 3'UTR(WT) (34) AAACTCACACTTAAAACACATGCCAGTTGGGAAGGTCTGAAAACTCAGTG

201 250

SEQ (201) CATAATAGGAACACTTGAGACTAATGAAAGAGAGAGTTGAGACCAATCTT

PTX3 3'UTR(WT) (84) CATAATAGGAACACTTGAGACTAATGAAAGAGAGAGTTGAGACCAATCTT

251 300

SEQ (251) TATTTGTACTGGCCAAATACTGAATAAACAGTTGAAGGAAAGACATTGGA

PTX3 3'UTR(WT) (134) TATTTGTACTGGCCAAATACTGAATAAACAGTTGAAGGAAAGACATTGGA

301 350

SEQ (301) AAAAGCTTTTGAGGATAATGTTACTAGACTTTATGCCATGGTGCTTTCAG

PTX3 3'UTR(WT) (184) AAAAGCTTTTGAGGATAATGTTACTAGACTTTATGCCATGGTGCTTTCAG

351 400

SEQ (351) TTTAATGCTGTGTCTCTGTCAGATAAACTCTCAAATAATTAAAAAGGACT

PTX3 3'UTR(WT) (234) TTTAATGCTGTGTCTCTGTCAGATAAACTCTCAAATAATTAAAAAGGACT

401 450

SEQ (401) GTATTGTTGAACAGAGGGACAATTGTTTTACTTTTCTTTGGTTAATTTTG

PTX3 3'UTR(WT) (284) GTATTGTTGAACAGAGGGACAATTGTTTTACTTTTCTTTGGTTAATTTTG

451 500

SEQ (451) TTTTGGCCAGAGATGAATTTTACATTGGAAGAATAACAAAATAAGATTTG

PTX3 3'UTR(WT) (334) TTTTGGCCAGAGATGAATTTTACATTGGAAGAATAACAAAATAAGATTTG

501 550

SEQ (501) TTGTCCATTGTTCATTGTTATTGGTATGTACCTTATTACAAAAAAAAGAT

PTX3 3'UTR(WT) (384) TTGTCCATTGTTCATTGTTATTGGTATGTACCTTATTACAAAAAAAAGAT

551 600

SEQ (551) GAAAACATATTTATACTACAAGGTGACTTAACAACTATAAATGTAGTTTA

PTX3 3'UTR(WT) (434) GAAAACATATTTATACTACAAGGTGACTTAACAACTATAAATGTAGTTTA

601 650

SEQ (601) TGTGTTATAATCGAATGTCACGTTTTTGAGAAGATAGTCATATAAGTTAT

PTX3 3'UTR(WT) (484) TGTGTTATAATCGAATGTCACGTTTTTGAGAAGATAGTCATATAAGTTAT

651 700

SEQ (651) ATTGCAAAAGGGATTTGTATTAATTTAAGACTATTTTTGTAAAGCTCTAC

PTX3 3'UTR(WT) (534) ATTGCAAAAGGGATTTGTATTAATTTAAGACTATTTTTGTAAAGCTCTAC

701 750

SEQ (701) TGTAAATAAAATATTTTATAAAACTAGCTCACGTCATTTAATTATAAATT

PTX3 3'UTR(WT) (584) TGTAAATAAAATATTTTATAAAACTAGCTCACGTCATTTAATTATAAATT

751 800

SEQ (751) TAAGAGATGTTTTGGAGCAAAAAGCTTAATAAAGGATCTTTTATTTTCAT

PTX3 3'UTR(WT) (634) TAAGAGATGTTTTGGAGCAAA-----------------------------

801 850

SEQ (801) TGGATCTGTGTGTTGGTTTTTTGTATGCGGCCGCTAGCTTGGCACTGGCC

PTX3 3'UTR(WT) (655) --------------------------------------------------

851 883

SEQ (851) GTCGTTTTACAACGTCGTGACTGGGAAAACCCT

PTX3 3'UTR(WT) (655) ---------------------------------
