# Supplementary material for: miR-101-3p suppresses proliferation of orbital fibroblasts by targeting pentraxin-3 in thyroid eye disease
Source: PeerJ journal article supplement (doi:10.7717/peerj.18535), 2024-11-15
Supplement: Raw_data_1.zip [file Sequencing analysis.docx]

CAGAGAGATCCTCATAAAGGCCAAGAAGGGCGGAAAGTCCAAATTGCTCGAGTGATGAAAGCTGCGCACTAGTGAGGGAGCTCATAGGCCGGCATAGACGCGTATGTTGTGAAACTCCACTTGAAGCCAAAGAAAGAAACTCACACTTAAAACACATGCCAGTTGGGAAGGTCTGAAAACTCAGTGCATAATAGGAACACTTGAGACTAATGAAAGAGAGAGTTGAGACCAATCTTTATTTGTACTGGCCAAATACTGAATAAACAGTTGAAGGAAAGACATTGGAAAAAGCTTTTGAGGATAATGTTACTAGACTTTATGCCATGGTGCTTTCAGTTTAATGCTGTGTCTCTGTCAGATAAACTCTCAAATAATTAAAAAGGACTGTATTGTTGAACAGAGGGACAATTGTTTTACTTTTCTTTGGTTAATTTTGTTTTGGCCAGAGATGAATTTTACATTGGAAGAATAACAAAATAAGATTTGTTGTCCATTGTTCATTGTTATTGGTATGTACCTTATTACAAAAAAAAGATGAAAACATATTTATACTACAAGGTGACTTAACAACTATAAATGTAGTTTATGTGTTATAATCGAATGTCACGTTTTTGAGAAGATAGTCATATAAGTTATATTGCAAAAGGGATTTGTATTAATTTAAGACTATTTTTGTAAAGCTCATGACATAATAAAATATTTTATAAAACTAGCTCACGTCATTTAATTATAAATTTAAGAGATGTTTTGGAGCAAAAAGCTTAATAAAGGATCTTTTATTTTCATTGGATCTGTGTGTTGGTTTTTTGTATGCGGCCGCTAGCTTGGCACTGGCCGTCGTTTTACAACGTCGTGACTGGGAAAACCCTGGCGTTACCCAACTTAATCGCCTTGCAGCAC

1 50

SEQ (1) CAGAGAGATCCTCATAAAGGCCAAGAAGGGCGGAAAGTCCAAATTGCTCG

PTX3 3'UTR(MUT) (1) --------------------------------------------------

51 100

SEQ (51) AGTGATGAAAGCTGCGCACTAGTGAGGGAGCTCATAGGCCGGCATAGACG

PTX3 3'UTR(MUT) (1) --------------------------------------------------

101 150

SEQ (101) CGTATGTTGTGAAACTCCACTTGAAGCCAAAGAAAGAAACTCACACTTAA

PTX3 3'UTR(MUT) (1) ---ATGTTGTGAAACTCCACTTGAAGCCAAAGAAAGAAACTCACACTTAA

151 200

SEQ (151) AACACATGCCAGTTGGGAAGGTCTGAAAACTCAGTGCATAATAGGAACAC

PTX3 3'UTR(MUT) (48) AACACATGCCAGTTGGGAAGGTCTGAAAACTCAGTGCATAATAGGAACAC

201 250

SEQ (201) TTGAGACTAATGAAAGAGAGAGTTGAGACCAATCTTTATTTGTACTGGCC

PTX3 3'UTR(MUT) (98) TTGAGACTAATGAAAGAGAGAGTTGAGACCAATCTTTATTTGTACTGGCC

251 300

SEQ (251) AAATACTGAATAAACAGTTGAAGGAAAGACATTGGAAAAAGCTTTTGAGG

PTX3 3'UTR(MUT) (148) AAATACTGAATAAACAGTTGAAGGAAAGACATTGGAAAAAGCTTTTGAGG

301 350

SEQ (301) ATAATGTTACTAGACTTTATGCCATGGTGCTTTCAGTTTAATGCTGTGTC

PTX3 3'UTR(MUT) (198) ATAATGTTACTAGACTTTATGCCATGGTGCTTTCAGTTTAATGCTGTGTC

351 400

SEQ (351) TCTGTCAGATAAACTCTCAAATAATTAAAAAGGACTGTATTGTTGAACAG

PTX3 3'UTR(MUT) (248) TCTGTCAGATAAACTCTCAAATAATTAAAAAGGACTGTATTGTTGAACAG

401 450

SEQ (401) AGGGACAATTGTTTTACTTTTCTTTGGTTAATTTTGTTTTGGCCAGAGAT

PTX3 3'UTR(MUT) (298) AGGGACAATTGTTTTACTTTTCTTTGGTTAATTTTGTTTTGGCCAGAGAT

451 500

SEQ (451) GAATTTTACATTGGAAGAATAACAAAATAAGATTTGTTGTCCATTGTTCA

PTX3 3'UTR(MUT) (348) GAATTTTACATTGGAAGAATAACAAAATAAGATTTGTTGTCCATTGTTCA

501 550

SEQ (501) TTGTTATTGGTATGTACCTTATTACAAAAAAAAGATGAAAACATATTTAT

PTX3 3'UTR(MUT) (398) TTGTTATTGGTATGTACCTTATTACAAAAAAAAGATGAAAACATATTTAT

551 600

SEQ (551) ACTACAAGGTGACTTAACAACTATAAATGTAGTTTATGTGTTATAATCGA

PTX3 3'UTR(MUT) (448) ACTACAAGGTGACTTAACAACTATAAATGTAGTTTATGTGTTATAATCGA

601 650

SEQ (601) ATGTCACGTTTTTGAGAAGATAGTCATATAAGTTATATTGCAAAAGGGAT

PTX3 3'UTR(MUT) (498) ATGTCACGTTTTTGAGAAGATAGTCATATAAGTTATATTGCAAAAGGGAT

651 700

SEQ (651) TTGTATTAATTTAAGACTATTTTTGTAAAGCTCATGACATAATAAAATAT

PTX3 3'UTR(MUT) (548) TTGTATTAATTTAAGACTATTTTTGTAAAGCTCATGACATAATAAAATAT

701 750

SEQ (701) TTTATAAAACTAGCTCACGTCATTTAATTATAAATTTAAGAGATGTTTTG

PTX3 3'UTR(MUT) (598) TTTATAAAACTAGCTCACGTCATTTAATTATAAATTTAAGAGATGTTTTG

751 800

SEQ (751) GAGCAAAAAGCTTAATAAAGGATCTTTTATTTTCATTGGATCTGTGTGTT

PTX3 3'UTR(MUT) (648) GAGCAAA-------------------------------------------

801 850

SEQ (801) GGTTTTTTGTATGCGGCCGCTAGCTTGGCACTGGCCGTCGTTTTACAACG

PTX3 3'UTR(MUT) (655) --------------------------------------------------

851 900

SEQ (851) TCGTGACTGGGAAAACCCTGGCGTTACCCAACTTAATCGCCTTGCAGCAC

PTX3 3'UTR(MUT) (655) --------------------------------------------------
