# Supplementary material for: miR-101-3p suppresses proliferation of orbital fibroblasts by targeting pentraxin-3 in thyroid eye disease
Source: PeerJ journal article supplement (doi:10.7717/peerj.18535), 2024-11-15
Supplement: Raw_data_2.zip [file EdU statistic analysis.xlsx]

## Sheet: EdU（%）
	mimic NC	mimic NC average	mimic	mimic average
cell1	0.4098	0.4574	0.1522	0.2063
	0.4808		0.2793
	0.4815		0.1875
cell2	0.4355	0.4185	0.1519	0.1927
	0.42		0.2429
	0.4		0.1833
cell3	0.46	0.4306	0.1449	0.1467
	0.3929		0.1563
	0.439		0.1389
