# Supplementary material for: miR-101-3p suppresses proliferation of orbital fibroblasts by targeting pentraxin-3 in thyroid eye disease
Source: PeerJ journal article supplement (doi:10.7717/peerj.18535), 2024-11-15
Supplement: Raw_data_2.zip [file EdU statistic analysis.xlsx]

## Sheet: EdU（%）
	mimic NC	mimic NC average	mimic	mimic average	mimic+rhPTX3	mimic+rhPTX3 average
cell1	0.4316	0.4603	0.2078	0.1712	0.2949	0.3155
	0.4878		0.0893		0.3431
	0.4615		0.2166		0.3085
cell2	0.4	0.417	0.1579	0.2031	0.2817	0.2985
	0.4681		0.2083		0.2727
	0.383		0.2432		0.3412
cell3	0.4182	0.4414	0.2323	0.208	0.3333	0.2985
	0.4615		0.2461		0.2714
	0.4444		0.1455		0.2909
