# Supplementary material for: miR-101-3p suppresses proliferation of orbital fibroblasts by targeting pentraxin-3 in thyroid eye disease
Source: PeerJ journal article supplement (doi:10.7717/peerj.18535), 2024-11-15
Supplement: Raw_data_2.zip [file Ki-67 statistic analysis.xlsx]

## Sheet: Ki-67（%）
	mimic NC	mimic NC average	mimic	mimic average
cell1	0.3673	0.329	0.1739	0.166
	0.2667		0.1455
	0.3529		0.1786
cell2	0.3469	0.3166	0.1111	0.1067
	0.325		0.1129
	0.2778		0.0962
cell3	0.3239	0.3044	0.1556	0.1489
	0.2769		0.1579
	0.3125		0.1333
