# Supplementary material for: miR-101-3p suppresses proliferation of orbital fibroblasts by targeting pentraxin-3 in thyroid eye disease
Source: PeerJ journal article supplement (doi:10.7717/peerj.18535), 2024-11-15
Supplement: Uncropped_Western_Blots.zip [file detail.docx]

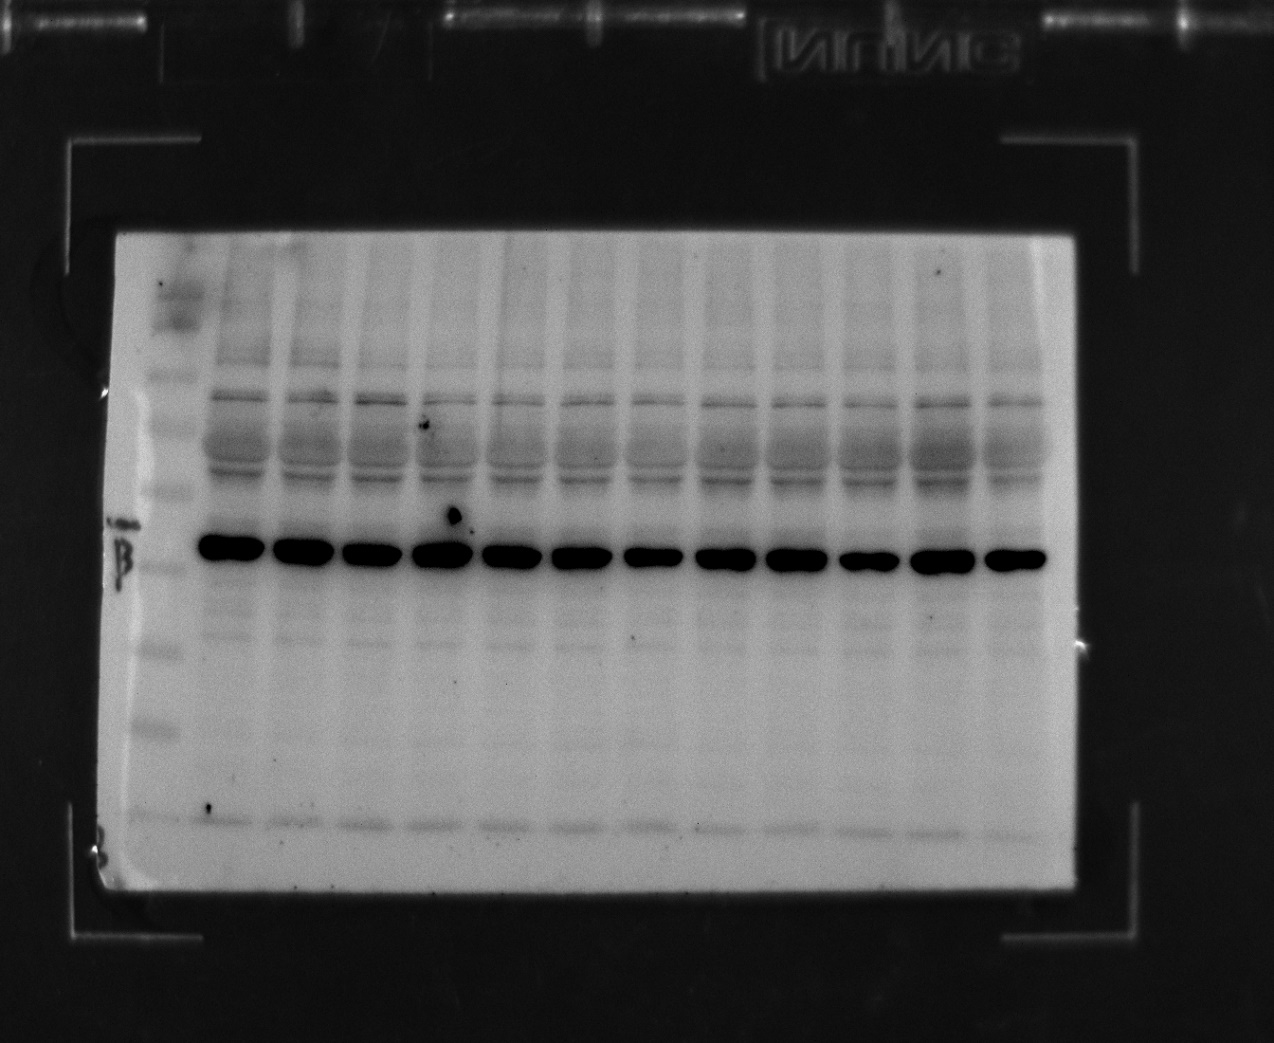

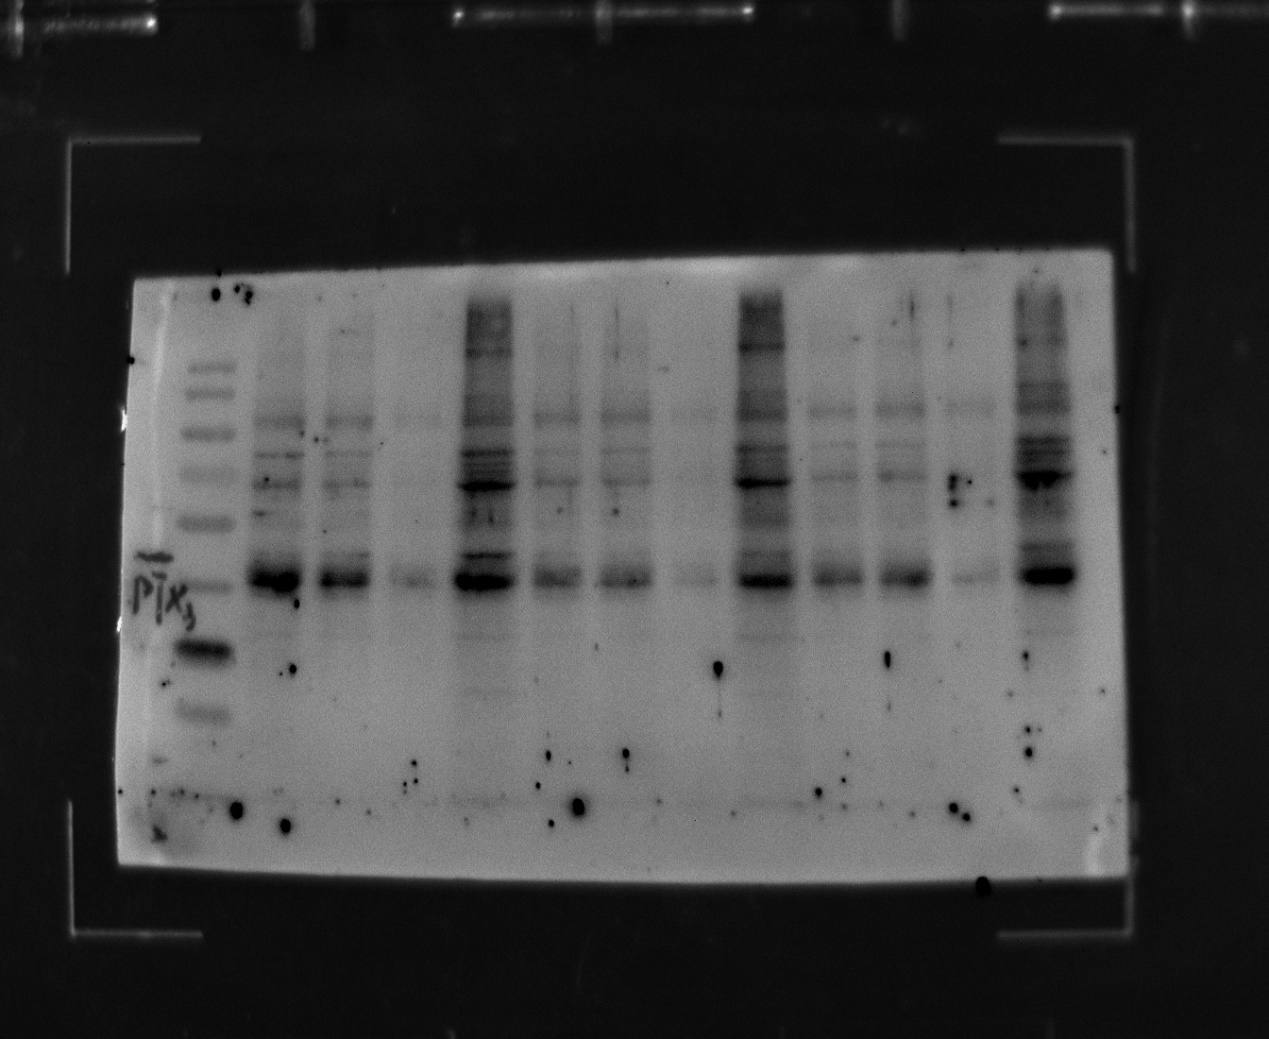


**mimic+rhPTX3**

**mimic+rhPTX3**

**mimic+rhPTX3**

**mimic+rhPTX3**

**mimic+rhPTX3**

**mimic+rhPTX3**

**miR-101-3p mimic**

**miR-101-3p mimic**

**miR-101-3p mimic**

**miR-101-3p mimic**

**miR-101-3p mimic**

**miR-101-3p mimic**

**mimic NC**

**mimic NC**

**mimic NC**

**mimic NC**

**mimic NC**

**mimic NC**

**blank control**

**blank control**

**blank control**

**blank control**

**blank control**

**blank control**

**case3**

**case2**

**case1**

**case3**

**case2**

**case1**
