# Supplementary material for: miR-101-3p suppresses proliferation of orbital fibroblasts by targeting pentraxin-3 in thyroid eye disease
Source: PeerJ journal article supplement (doi:10.7717/peerj.18535), 2024-11-15
Supplement: Uncropped_Western_Blots.zip [file WB(Figure 4).xlsx]

## Sheet: Sheet1
	PTX3	β-actin	ratio
1	16501.8	20776.2	0.794264
2	7870.2	20786.7	0.378617
3	15499.3	20386.2	0.760287
4	16275.4	19236.7	0.846061
5	7786.2	16567.2	0.469977
6	14454.4	18024.6	0.801928
7	13424.7	18061.3	0.743287
8	7925.38	15618.2	0.507446
9	11165.7	15894.7	0.70248
