# Supplementary material for: miR-101-3p suppresses proliferation of orbital fibroblasts by targeting pentraxin-3 in thyroid eye disease
Source: PeerJ journal article supplement (doi:10.7717/peerj.18535), 2024-11-15
Supplement: Uncropped_Western_Blots.zip [file WB(Figure 5).xlsx]

## Sheet: Sheet1
	PTX3	β-actin	ratio
1	20537	24324.4	0.844296
2	15671.4	25091.9	0.624562
3	6687.72	22420.3	0.298289
4	27491.3	27350.2	1.00516
5	11246.8	23343.5	0.481794
6	11503.9	23331.4	0.493062
7	4307.43	18964.3	0.227133
8	21966.5	22192.7	0.989806
9	11523.5	23422.7	0.491979
10	11462.9	17615	0.650746
11	3575.72	24007.9	0.14894
12	24073.8	17686.5	1.36114
