# Supplementary figures and images for: miR-101-3p suppresses proliferation of orbital fibroblasts by targeting pentraxin-3 in thyroid eye disease
Source: PeerJ journal article supplement (doi:10.7717/peerj.18535), 2024-11-15

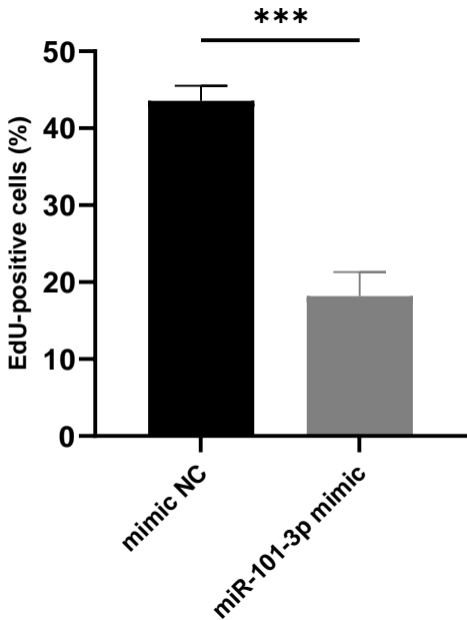

Supplement: Raw_data_2.zip [file EdU-positive cells(%).pdf › Raw data 2/EdU(Fig.3)/EdU-positive cells(%).pdf]

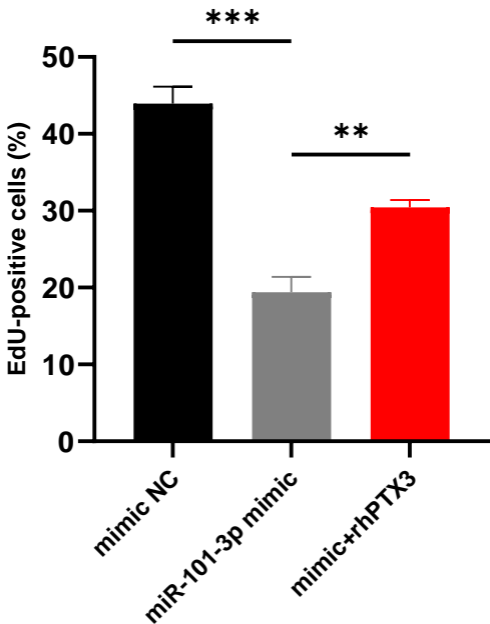

Supplement: Raw_data_2.zip [file EdU-positive cells(%).pdf › Raw data 2/EdU(Fig.5)/EdU-positive cells(%).pdf]

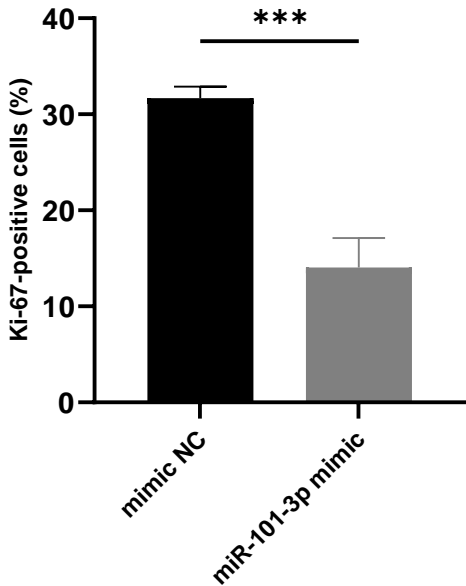

Supplement: Raw_data_2.zip [file Ki-67-positive cells(%).pdf › Raw data 2/Ki-67(Fig.3)/Ki-67-positive cells(%).pdf]

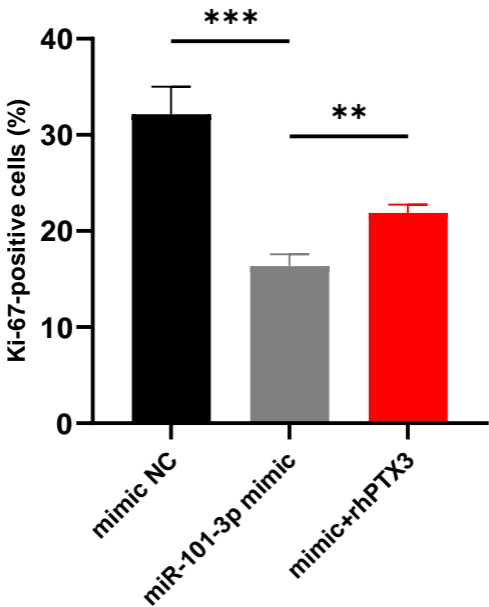

Supplement: Raw_data_2.zip [file Ki-67-positive cells(%).pdf › Raw data 2/Ki-67(Fig.5)/Ki-67-positive cells(%).pdf]

# Results

| blank | 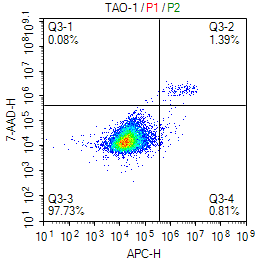 | 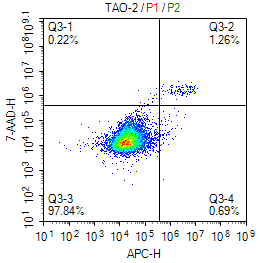 | 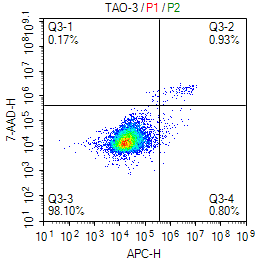 |
| --- | --- | --- | --- |
| mimic NC | 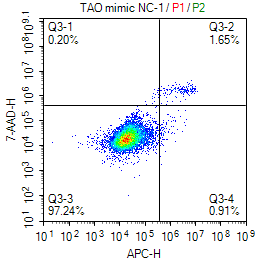 | 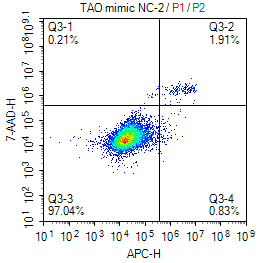 | 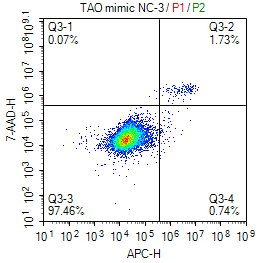 |
| miR-101-3p mimic | 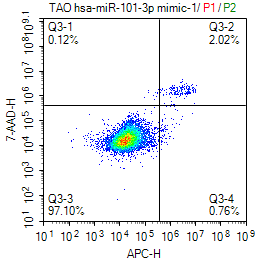 | 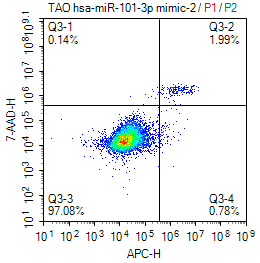 | 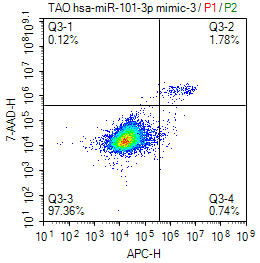 |

Supplement: Raw_data_1.zip [file Experimental result.docx]
